# Supplementary material
Source: ML conference proceedings conference paper supplement (https://proceedings.mlr.press/v119/wang20k.html)
Supplement: Supplementary file [file wang20k-supp.pdf]

---

# Understanding Contrastive Representation Learning through Alignment and Uniformity on the Hypersphere Supplementary Material

---

Tongzhou Wang<sup>1</sup> Phillip Isola<sup>1</sup>

## S-1. Proofs and Additional Theoretical Results

In this section, we present proofs for propositions and theorems in main paper Sections 4.1.2 and 4.2.

The propositions in Section 4.1.2 illustrate the deep relations between the Gaussian kernel  $G_t: \mathcal{S}^d \times \mathcal{S}^d \rightarrow \mathbb{R}$  and the uniform distribution on the unit hypersphere  $\mathcal{S}^d$ . As we will show below in Section S-1.1, these properties directly follow well-known results on strictly positive definite kernels.

In Section S-1.2, we present a proof for Theorem 1. Theorem 1 describes the asymptotic behavior of  $\mathcal{L}_{\text{contrastive}}$  as the number of negative samples  $M$  approaches infinity. The theorem is strongly related to empirical contrastive learning, given an error term (deviation from the limit) decaying in  $\mathcal{O}(M^{-2/3})$  and that empirical practices often use a large number of negatives (e.g.,  $M = 65536$  in He et al. (2019)) based on the observation that using more negatives consistently leads to better representation quality (Wu et al., 2018; Tian et al., 2019; He et al., 2019). Our proof further reveals connections between  $\mathcal{L}_{\text{contrastive}}$  and  $\mathcal{L}_{\text{uniform}}$  which is defined via the Gaussian kernels.

Finally, also in Section S-1.2, we present a weaker result on the setting where only a single negative is used in  $\mathcal{L}_{\text{contrastive}}$  (i.e.,  $M = 1$ ).

### S-1.1. Proofs for Section 4.1.2

To prove Propositions 1 and 2, we utilize the *strict positive definiteness* (Bochner, 1992; Stewart, 1976) of the Gaussian kernel  $G_t$ :

$$G_t(u, v) \triangleq e^{-t\|u-v\|_2^2} = e^{2t \cdot u^\top v - 2t}, \quad t > 0.$$

From there, we apply a known result about such kernels, from which the two propositions directly follow.

**Definition** (Strict positive definiteness (Bochner, 1992; Stewart, 1976)). A symmetric and lower semi-continuous kernel  $K$  on  $A \times A$  (where  $A$  is infinite and compact) is called strictly positive definite if for every finite signed Borel measure  $\mu$  supported on  $A$  whose energy

$$I_K[\mu] \triangleq \int_{\mathcal{S}^d} \int_{\mathcal{S}^d} K(u, v) d\mu(v) d\mu(u)$$

is well defined, we have  $I_K[\mu] \geq 0$ , where equality holds only if  $\mu \equiv 0$  on the  $\sigma$ -algebra of Borel subsets of  $A$ .

**Definition.** Let  $\mathcal{M}(\mathcal{S}^d)$  be the set of Borel probability measures on  $\mathcal{S}^d$ .

We are now in the place to apply the following two well-known results, which we present by restating Proposition 4.4.1, Theorem 6.2.1 and Corollary 6.2.2 of Borodachov et al. (2019) in weaker forms. We refer readers to Borodachov et al. (2019) for their proofs.

**Lemma 1** (Strict positive definiteness of  $G_t$ ). *For  $t > 0$ , the Gaussian kernel  $G_t(u, v) \triangleq e^{-t\|u-v\|_2^2} = e^{2t \cdot u^\top v - 2t}$  is strictly positive definite on  $\mathcal{S}^d \times \mathcal{S}^d$ .*

**Lemma 2** (Strictly positive definite kernels on  $\mathcal{S}^d$ ). *Consider kernel  $K_f: \mathcal{S}^d \times \mathcal{S}^d \rightarrow (-\infty, +\infty]$  of the form,*

$$K_f(u, v) \triangleq f(\|u - v\|_2^2). \tag{1}$$

---

<sup>1</sup>MIT Computer Science & Artificial Intelligence Lab (CSAIL). Correspondence to: Tongzhou Wang <tongzhou@mit.edu>.

If  $K_f$  is strictly positive definite on  $\mathcal{S}^d \times \mathcal{S}^d$  and  $I_{K_f}[\sigma_d]$  is finite, then  $\sigma_d$  is the unique measure (on Borel subsets of  $\mathcal{S}^d$ ) in the solution of  $\min_{\mu \in \mathcal{M}(\mathcal{S}^d)} I_{K_f}[\mu]$ , and the normalized counting measures associated with any  $K_f$ -energy minimizing sequence of  $N$ -point configurations on  $\mathcal{S}^d$  converges weak\* to  $\sigma_d$ .

In particular, this conclusion holds whenever  $f$  has the property that  $-f'(t)$  is strictly completely monotone on  $(0, 4]$  and  $I_{K_f}[\sigma_d]$  is finite.

We now recall Propositions 1 and 2.

**Proposition 1.**  $\sigma_d$  is the unique solution (on Borel subsets of  $\mathcal{S}^d$ ) of

$$\min_{\mu \in \mathcal{M}(\mathcal{S}^d)} I_{G_t}[\mu] = \min_{\mu \in \mathcal{M}(\mathcal{S}^d)} \int_{\mathcal{S}^d} \int_{\mathcal{S}^d} G_t(u, v) d\mu(v) d\mu(u). \quad (2)$$

*Proof of Proposition 1.* This is a direct consequence of Lemmas 1 and 2. □

**Proposition 2.** For each  $N > 0$ , the  $N$  point minimizer of the average pairwise potential is

$$\mathbf{u}_N^* = \arg \min_{u_1, u_2, \dots, u_N \in \mathcal{S}^d} \sum_{1 \leq i < j \leq N} G_t(u_i, u_j).$$

The normalized counting measures associated with the  $\{\mathbf{u}_N^*\}_{N=1}^\infty$  sequence converge weak\* to  $\sigma_d$ .

*Proof of Proposition 2.* This is a direct consequence of Lemmas 1 and 2. □

### S-1.2. Proofs and Additional Results for Section 4.2

The following lemma directly follows Theorem 3.3 and Remarks 3.4 (b)(i) of [Serfozo \(1982\)](#). We refer readers to [Serfozo \(1982\)](#) for its proof.

**Lemma 3.** Let  $A$  be a compact second countable Hausdorff space. Suppose

1.  $\{\mu_n\}_{n=1}^\infty$  is a sequence of finite and positive Borel measures supported on  $A$  that converges weak\* to some finite and positive Borel measure  $\mu$  (which is same as vague convergence since  $A$  is compact);
2.  $\{f_n\}_{n=1}^\infty$  is a sequence of Borel measurable functions that converges continuously to a Borel measurable  $f$ ;
3.  $\{f_n\}_n$  are uniformly bounded over  $A$ .

Then, we have the following convergence:

$$\lim_{n \rightarrow \infty} \int_{x \in A} f_n(x) d\mu_n(x) = \int_{x \in A} f(x) d\mu(x).$$

We now recall Theorem 1.

**Theorem 1** (Asymptotics of  $\mathcal{L}_{\text{contrastive}}$ ). For fixed  $\tau > 0$ , as the number of negative samples  $M \rightarrow \infty$ , the (normalized) contrastive loss converges to

$$\begin{aligned} & \lim_{M \rightarrow \infty} \mathcal{L}_{\text{contrastive}}(f; \tau, M) - \log M \\ &= \lim_{M \rightarrow \infty} \mathbb{E}_{\substack{(x, y) \sim p_{\text{pos}} \\ \{x_i^-\}_{i=1}^M \stackrel{i.i.d.}{\sim} p_{\text{data}}}} \left[ -\log \frac{e^{f(x)^\top f(y)/\tau}}{e^{f(x)^\top f(y)/\tau} + \sum_i e^{f(x_i^-)^\top f(y)/\tau}} \right] - \log M \\ &= -\frac{1}{\tau} \mathbb{E}_{(x, y) \sim p_{\text{pos}}} [f(x)^\top f(y)] + \mathbb{E}_{x \sim p_{\text{data}}} \left[ \log \mathbb{E}_{x^- \sim p_{\text{data}}} \left[ e^{f(x^-)^\top f(x)/\tau} \right] \right]. \end{aligned} \quad (2)$$

We have the following results:

1. The first term is minimized iff  $f$  is perfectly aligned.
2. If perfectly uniform encoders exist, they form the exact minimizers of the second term.

3. For the convergence in Equation (2), the absolute deviation from the limit (i.e., the error term) decays in  $\mathcal{O}(M^{-2/3})$ .

*Proof of Theorem 1.* We first show the convergence stated in Equation (2) along with its speed (result 3), and then the relations between the two limiting terms and the alignment and uniformity properties (results 1 and 2).

• **Proof of the convergence in Equation (2) and the  $\mathcal{O}(M^{-2/3})$  decay rate of its error term (result 3).**

Note that for any  $x, y \in \mathbb{R}^n$  and  $\{x_i^-\}_{i=1}^M \stackrel{\text{i.i.d.}}{\sim} p_{\text{data}}$ , we have

$$\lim_{M \rightarrow \infty} \log \left( \frac{1}{M} e^{f(x)^\top f(y)/\tau} + \frac{1}{M} \sum_{i=1}^M e^{f(x_i^-)^\top f(x)/\tau} \right) = \log_{x^- \sim p_{\text{data}}} \mathbb{E} \left[ e^{f(x^-)^\top f(x)/\tau} \right] \quad \text{almost surely,} \quad (3)$$

by the strong law of large numbers (SLLN) and the Continuous Mapping Theorem.

Then, we can derive

$$\begin{aligned} & \lim_{M \rightarrow \infty} \mathcal{L}_{\text{contrastive}}(f; \tau, M) - \log M \\ &= \mathbb{E}_{(x,y) \sim p_{\text{pos}}} \left[ -f(x)^\top f(y)/\tau \right] + \lim_{M \rightarrow \infty} \mathbb{E}_{\substack{(x,y) \sim p_{\text{pos}} \\ \{x_i^-\}_{i=1}^M \stackrel{\text{i.i.d.}}{\sim} p_{\text{data}}}} \left[ \log \left( \frac{1}{M} e^{f(x)^\top f(y)/\tau} + \frac{1}{M} \sum_{i=1}^M e^{f(x_i^-)^\top f(x)/\tau} \right) \right] \\ &= \mathbb{E}_{(x,y) \sim p_{\text{pos}}} \left[ -f(x)^\top f(y)/\tau \right] + \mathbb{E} \left[ \lim_{M \rightarrow \infty} \log \left( \frac{1}{M} e^{f(x)^\top f(y)/\tau} + \frac{1}{M} \sum_{i=1}^M e^{f(x_i^-)^\top f(x)/\tau} \right) \right] \\ &= -\frac{1}{\tau} \mathbb{E}_{(x,y) \sim p_{\text{pos}}} \left[ f(x)^\top f(y) \right] + \mathbb{E}_{x \sim p_{\text{data}}} \left[ \log_{x^- \sim p_{\text{data}}} \mathbb{E} \left[ e^{f(x^-)^\top f(x)/\tau} \right] \right], \end{aligned}$$

where we justify the switching of expectation and limit by the convergence stated in Equation (3), the boundedness of  $e^{u^\top v/\tau}$  (where  $u, v \in \mathcal{S}^d, \tau > 0$ ), and the Dominated Convergence Theorem (DCT).

For convergence speed, we consider both sides:

$$\begin{aligned} & (\mathcal{L}_{\text{contrastive}}(f; \tau, M) - \log M) - \left( \lim_{M \rightarrow \infty} \mathcal{L}_{\text{contrastive}}(f; \tau, M) - \log M \right) \\ &= \mathbb{E}_{\substack{(x,y) \sim p_{\text{pos}} \\ \{x_i^-\}_{i=1}^M \stackrel{\text{i.i.d.}}{\sim} p_{\text{data}}}} \left[ \log \left( \frac{1}{M} e^{f(x)^\top f(y)/\tau} + \frac{1}{M} \sum_{i=1}^M e^{f(x_i^-)^\top f(x)/\tau} \right) \right] - \mathbb{E}_{x \sim p_{\text{data}}} \left[ \log_{x^- \sim p_{\text{data}}} \mathbb{E} \left[ e^{f(x^-)^\top f(x)/\tau} \right] \right] \\ &\leq \mathbb{E}_{\substack{x \sim p_{\text{data}} \\ \{x_i^-\}_{i=1}^M \stackrel{\text{i.i.d.}}{\sim} p_{\text{data}}}} \left[ \log \left( \frac{1}{M} e^{1/\tau} + \frac{1}{M} \sum_{i=1}^M e^{f(x_i^-)^\top f(x)/\tau} \right) \right] - \mathbb{E}_{x \sim p_{\text{data}}} \left[ \log_{x^- \sim p_{\text{data}}} \mathbb{E} \left[ e^{f(x^-)^\top f(x)/\tau} \right] \right] \\ &\leq \mathbb{E}_{x \sim p_{\text{data}}} \left[ \log_{\substack{x_i^- \stackrel{\text{i.i.d.}}{\sim} p_{\text{data}} \\ \{x_i^-\}_{i=1}^M}} \mathbb{E} \left[ \frac{1}{M} e^{1/\tau} + \frac{1}{M} \sum_{i=1}^M e^{f(x_i^-)^\top f(x)/\tau} \right] - \log_{x^- \sim p_{\text{data}}} \mathbb{E} \left[ e^{f(x^-)^\top f(x)/\tau} \right] \right] \\ &= \mathbb{E}_{x \sim p_{\text{data}}} \left[ \log_{x^- \sim p_{\text{data}}} \mathbb{E} \left[ \frac{1}{M} e^{1/\tau} + e^{f(x^-)^\top f(x)/\tau} \right] - \log_{x^- \sim p_{\text{data}}} \mathbb{E} \left[ e^{f(x^-)^\top f(x)/\tau} \right] \right] \\ &\leq \mathbb{E}_{x \sim p_{\text{data}}} \left[ \frac{1}{M} e^{2/\tau} \right] \\ &= \frac{1}{M} e^{2/\tau}, \end{aligned} \quad (4)$$

where the last inequality follows the concavity of log, and

$$\begin{aligned}
 & \left( \lim_{M \rightarrow \infty} \mathcal{L}_{\text{contrastive}}(f; \tau, M) - \log M \right) - (\mathcal{L}_{\text{contrastive}}(f; \tau, M) - \log M) \\
 &= \mathbb{E}_{\substack{(x,y) \sim p_{\text{pos}} \\ \{x_i^-\}_{i=1}^M \stackrel{\text{i.i.d.}}{\sim} p_{\text{data}}}} \left[ \log \mathbb{E}_{x^- \sim p_{\text{data}}} \left[ e^{f(x^-)^\top f(x)/\tau} \right] - \log \left( \frac{1}{M} e^{f(x)^\top f(y)/\tau} + \frac{1}{M} \sum_{i=1}^M e^{f(x_i^-)^\top f(x)/\tau} \right) \right] \\
 &\leq \frac{M}{M+1} e^{1/\tau} \mathbb{E}_{\substack{(x,y) \sim p_{\text{pos}} \\ \{x_i^-\}_{i=1}^M \stackrel{\text{i.i.d.}}{\sim} p_{\text{data}}}} \left[ \left| \mathbb{E}_{x^- \sim p_{\text{data}}} \left[ e^{f(x^-)^\top f(x)/\tau} \right] - \left( \frac{1}{M} e^{f(x)^\top f(y)/\tau} + \frac{1}{M} \sum_{i=1}^M e^{f(x_i^-)^\top f(x)/\tau} \right) \right| \right] \\
 &\leq \frac{1}{M+1} e^{2/\tau} + \frac{M}{M+1} e^{1/\tau} \mathbb{E}_{x, \{x_i^-\}_{i=1}^M \stackrel{\text{i.i.d.}}{\sim} p_{\text{data}}} \left[ \left| \mathbb{E}_{x^- \sim p_{\text{data}}} \left[ e^{f(x^-)^\top f(x)/\tau} \right] - \frac{1}{M} \sum_{i=1}^M e^{f(x_i^-)^\top f(x)/\tau} \right| \right] \\
 &\leq \frac{1}{M+1} e^{2/\tau} + \frac{5}{4} \frac{M^{1/3}}{M+1} e^{1/\tau} \left( e^{1/\tau} - e^{-1/\tau} \right), \tag{5}
 \end{aligned}$$

where the first inequality follows the concavity of log and the last inequality follows the simple bound from Chebychev's inequality: denoting i.i.d. random variables  $e^{f(x_i)^\top f(x)/\tau}$  for  $x_i \sim p_{\text{data}}$  as  $Y_i$  with  $\text{supp}(Y_i) \subset [e^{-1/\tau}, e^{1/\tau}]$ , and their mean as  $\bar{Y} \triangleq \mathbb{E}[Y_i]$ , we have

$$\begin{aligned}
 \mathbb{E} \left[ \left| \frac{1}{M} \sum_{i=1}^M Y_i - \bar{Y} \right| \right] &\leq \mathbb{P} \left[ \left| \frac{1}{M} \sum_{i=1}^M Y_i - \bar{Y} \right| \geq M^{-2/3} \left( e^{1/\tau} - e^{-1/\tau} \right) \right] \left( e^{1/\tau} - e^{-1/\tau} \right) \\
 &\quad + \left( 1 - \mathbb{P} \left[ \left| \frac{1}{M} \sum_{i=1}^M Y_i - \bar{Y} \right| \geq M^{-2/3} \left( e^{1/\tau} - e^{-1/\tau} \right) \right] \right) M^{-2/3} \left( e^{1/\tau} - e^{-1/\tau} \right) \\
 &\leq \frac{\text{Var}[Y_i]}{M^2 \cdot M^{-4/3} (e^{1/\tau} - e^{-1/\tau})^2} \left( e^{1/\tau} - e^{-1/\tau} \right) + M^{-2/3} \left( e^{1/\tau} - e^{-1/\tau} \right) \\
 &\leq \frac{5}{4} M^{-2/3} \left( e^{1/\tau} - e^{-1/\tau} \right),
 \end{aligned}$$

where the last inequality is from  $\text{Var}[Y_i] \leq \frac{1}{4} (e^{1/\tau} - e^{-1/\tau})^2$  given its bounded support.

Combining both sides, we can immediately see that the absolute deviation from the limit decays in  $\mathcal{O}(M^{-2/3})$ .

- **Proof of result 1: The first term is minimized iff  $f$  is perfectly aligned.**

Note that for  $u, v \in \mathcal{S}^d$ ,

$$\|u - v\|_2^2 = 2 - 2 \cdot u^\top v.$$

Then the result follows directly the definition of perfect alignment, and the existence of perfectly aligned encoders (e.g., an encoder that maps every input to the same output vector).

- **Proof of result 2: If perfectly uniform encoders exist, they form the exact minimizers of the second term.**

For simplicity, we define the following notation:

**Definition.**  $\forall \mu \in \mathcal{M}(\mathcal{S}^d)$ ,  $u \in \mathcal{S}^d$ , we define the continuous and Borel measurable function

$$U_\mu(u) \triangleq \int_{\mathcal{S}^d} e^{u^\top v/\tau} d\mu(v). \tag{6}$$

with its range bounded in  $[e^{-1/\tau}, e^{1/\tau}]$ .

Then the second term can be equivalently written as

$$\mathbb{E}_{x \sim p_{\text{data}}} \left[ \log \mathbb{E}_{x^- \sim p_{\text{data}}} \left[ e^{f(x^-)^\top f(x)/\tau} \right] \right] = \mathbb{E}_{x \sim p_{\text{data}}} \left[ \log U_{p_{\text{data}} \circ f^{-1}}(f(x)) \right],$$

where  $p_{\text{data}} \circ f^{-1} \in \mathcal{M}(\mathcal{S}^d)$  is the probability measure of features, i.e., the pushforward measure of  $p_{\text{data}}$  via  $f$ .

We now consider the following relaxed problem, where the minimization is taken over  $\mathcal{M}(\mathcal{S}^d)$ , all possible Borel probability measures on the hypersphere  $\mathcal{S}^d$ :

$$\min_{\mu \in \mathcal{M}(\mathcal{S}^d)} \int_{\mathcal{S}^d} \log U_{\mu}(u) \, d\mu(u). \quad (7)$$

Our strategy is to show that the unique minimizer of Equation (7) is  $\sigma_d$ , from which the result 2 directly follows. The rest of the proof is structured in three parts.

**1. We show that minimizers of Equation (7) exist, i.e., the above infimum is attained for some  $\mu \in \mathcal{M}(\mathcal{S}^d)$ .**

Let  $\{\mu_m\}_{m=1}^{\infty}$  be a sequence in  $\mathcal{M}(\mathcal{S}^d)$  such that the infimum of Equation (7) is reached in the limit:

$$\lim_{m \rightarrow \infty} \int_{\mathcal{S}^d} \log U_{\mu_m}(u) \, d\mu_m(u) = \inf_{\mu \in \mathcal{M}(\mathcal{S}^d)} \int_{\mathcal{S}^d} \log U_{\mu}(u) \, d\mu(u).$$

From the Helly's Selection Theorem, let  $\mu^*$  denote some weak\* cluster point of this sequence. Then  $\mu_m$  converges weak\* to  $\mu^*$  along a subsequence  $m \in \mathcal{N} \in \mathbb{N}$ . For simplicity and with a slight abuse of notation, we denote this convergent (sub)sequence of measures by  $\{\mu_n\}_{n=1}^{\infty}$ .

We want to show that  $\mu^*$  attains the limit (and thus the infimum), i.e.,

$$\int_{\mathcal{S}^d} \log U_{\mu^*}(u) \, d\mu^*(u) = \lim_{n \rightarrow \infty} \int_{\mathcal{S}^d} \log U_{\mu_n}(u) \, d\mu_n(u). \quad (8)$$

In view of Lemma 3, since  $\mathcal{S}^d$  is a compact second countable Hausdorff space and  $\{\log U_{\mu_n}\}_n$  is uniformly bounded over  $\mathcal{S}^d$ , it remains to prove that  $\{\log U_{\mu_n}\}_n$  is continuously convergent to  $\log U_{\mu^*}$ .

Consider any convergent sequence of points  $\{x_n\}_{n=1}^{\infty} \in \mathbb{R}^{d+1}$  s.t.  $x_n \rightarrow x$  where  $x \in \mathcal{S}^d$ .

Let  $\delta_n = x_n - x$ . By simply expanding  $U_{\mu_n}$  and  $U_{\mu^*}$ , we have

$$e^{-\|\delta_n\|/\tau} U_{\mu_n}(x) \leq U_{\mu_n}(x_n) \leq e^{\|\delta_n\|/\tau} U_{\mu_n}(x).$$

Since both the upper and the lower bound converge to  $U_{\mu^*}(x)$  (by the weak\* convergence of  $\{\mu_n\}_n$  to  $\mu^*$ ),  $U_{\mu_n}(x_n)$  must as well. We have proved the continuous convergence of  $\{\log U_{\mu_n}\}_n$  to  $\log U_{\mu^*}$ .

Therefore, the limit in Equation (8) holds. The infimum is thus attained at  $\mu^*$ :

$$\lim_{n \rightarrow \infty} \int_u \log U_{\mu_n}(u) \, d\mu_n = \int_u \log U_{\mu^*}(u) \, d\mu^*.$$

**2. We show that  $U_{\mu^*}$  is constant  $\mu^*$ -almost surely for any minimizer  $\mu^*$  of Equation (7).**

Let  $\mu^*$  be any solution of Equation (7):

$$\mu^* \in \arg \min_{\mu \in \mathcal{M}(\mathcal{S}^d)} \int_u \log U_{\mu}(u) \, d\mu.$$

Consider the Borel sets where  $\mu^*$  has positive measure:  $\mathcal{T} \triangleq \{T \in \mathcal{B}(\mathcal{S}^d) : \mu^*(T) > 0\}$ . For any  $T \in \mathcal{T}$ , let  $\mu_T^*$  denote the conditional distribution of  $\mu^*$  on  $T$ , i.e.,  $\forall A \in \mathcal{B}(\mathcal{S}^d)$ ,

$$\mu_T^*(A) = \frac{\mu^*(A \cap T)}{\mu^*(T)}.$$

Note that for any such  $T \in \mathcal{T}$ , the mixture  $(1 - \alpha)\mu^* + \alpha\mu_T^*$  is a valid probability distribution (i.e., in  $\mathcal{M}(\mathcal{S}^d)$ ) for  $\alpha \in (-\mu^*(T), 1)$ , an open interval containing 0.

By the first variation, we must have

$$\begin{aligned}
 0 &= \frac{\partial}{\partial \alpha} \int_{\mathcal{S}^d} \log U_{(1-\alpha)\mu^* + \alpha\mu_T^*}(u) d((1-\alpha)\mu^* + \alpha\mu_T^*)(u) \Big|_{\alpha=0} \\
 &= \frac{\partial}{\partial \alpha} (1-\alpha) \int_{\mathcal{S}^d} \log U_{(1-\alpha)\mu^* + \alpha\mu_T^*}(u) d\mu^*(u) \Big|_{\alpha=0} + \frac{\partial}{\partial \alpha} \alpha \int_{\mathcal{S}^d} \log U_{(1-\alpha)\mu^* + \alpha\mu_T^*}(u) d\mu_T^*(u) \Big|_{\alpha=0} \\
 &= - \int_{\mathcal{S}^d} \log U_{(1-\alpha)\mu^* + \alpha\mu_T^*}(u) d\mu^*(u) \Big|_{\alpha=0} + \frac{\partial}{\partial \alpha} \int_{\mathcal{S}^d} \log U_{(1-\alpha)\mu^* + \alpha\mu_T^*}(u) d\mu^*(u) \Big|_{\alpha=0} \\
 &\quad + \int_{\mathcal{S}^d} \log U_{(1-\alpha)\mu^* + \alpha\mu_T^*}(u) d\mu_T^*(u) \Big|_{\alpha=0} + 0 \cdot \frac{\partial}{\partial \alpha} \int_{\mathcal{S}^d} \log U_{(1-\alpha)\mu^* + \alpha\mu_T^*}(u) d\mu_T^*(u) \Big|_{\alpha=0} \\
 &= - \int_{\mathcal{S}^d} \log U_{\mu^*}(u) d\mu^*(u) + \int_{\mathcal{S}^d} \frac{U_{\mu_T^*}(u) - U_{\mu^*}(u)}{U_{\mu^*}(u)} d\mu^*(u) \\
 &\quad + \int_{\mathcal{S}^d} \log U_{\mu^*}(u) d\mu_T^*(u) + 0 \cdot \int_{\mathcal{S}^d} \frac{U_{\mu_T^*}(u) - U_{\mu^*}(u)}{U_{\mu^*}(u)} d\mu_T^*(u) \\
 &= \int_{\mathcal{S}^d} \frac{U_{\mu_T^*}(u)}{U_{\mu^*}(u)} d\mu^*(u) + \int_{\mathcal{S}^d} \log U_{\mu^*}(u) d(\mu_T^* - \mu^*)(u) - 1, \tag{9}
 \end{aligned}$$

where the Leibniz rule along with the boundedness of  $U_{\mu^*}$  and  $U_{\mu_T^*}$  together justify the exchanges of integration and differentiation.

Let  $\{T_n\}_{n=1}^\infty$  be a sequence of sets in  $\mathcal{T}$  such that

$$\lim_{n \rightarrow \infty} \int_{\mathcal{S}^d} U_{\mu^*}(u) d\mu_{T_n}^*(u) = \sup_{T \in \mathcal{T}} \int_{\mathcal{S}^d} U_{\mu^*}(u) d\mu_T^*(u) \triangleq U^*,$$

where the supremum must exist since  $U_{\mu^*}$  is bounded above.

Because  $U_{\mu^*}$  is a continuous and Borel measurable function, we have  $\{u: U_{\mu^*}(u) > U^*\} \in \mathcal{B}(\mathcal{S}^d)$  and thus

$$\begin{aligned}
 \mu^*(\{u: U_{\mu^*}(u) > U^*\}) &= 0, \\
 \mu_{T_n}^*(\{u: U_{\mu^*}(u) > U^*\}) &= 0, \quad \forall n = 1, 2, \dots,
 \end{aligned}$$

otherwise  $\{u: U_{\mu^*}(u) > U^*\} \in \mathcal{T}$ .

Asymptotically,  $U_{\mu^*}$  is constant  $\mu_{T_n}^*$ -almost surely:

$$\begin{aligned}
 &\int_{\mathcal{S}^d} \left| U_{\mu^*}(u) - \int_{\mathcal{S}^d} U_{\mu^*}(u') d\mu_{T_n}^*(u') \right| d\mu_{T_n}^*(u) \\
 &= 2 \int_{\mathcal{S}^d} \max \left( 0, U_{\mu^*}(u) - \int_{\mathcal{S}^d} U_{\mu^*}(u') d\mu_{T_n}^*(u') \right) d\mu_{T_n}^*(u) \\
 &\leq 2(U^* - \int_{\mathcal{S}^d} U_{\mu^*}(u) d\mu_{T_n}^*(u)) \\
 &\rightarrow 0, \quad \text{as } n \rightarrow \infty,
 \end{aligned}$$

where the inequality follows the boundedness of  $U_{\mu^*}$  and that  $\mu_{T_n}^*(\{u: U_{\mu^*}(u) > U^*\}) = 0$ .

Therefore, given the continuity of log and the boundedness of  $U_{\mu^*}$ , we have

$$\lim_{n \rightarrow \infty} \int_{\mathcal{S}^d} \log U_{\mu^*}(u) d\mu_{T_n}^* = \log U^*.$$

Equation (9) gives that  $\forall n = 1, 2, \dots$ ,

$$\begin{aligned}
 1 &= \int_{\mathcal{S}^d} \frac{U_{\mu_{T_n}^*}(u)}{U_{\mu^*}(u)} d\mu^* + \int_{\mathcal{S}^d} \log U_{\mu^*}(u) d(\mu_{T_n}^* - \mu^*) \\
 &\geq \frac{1}{U^*} \int_{\mathcal{S}^d} U_{\mu_{T_n}^*}(u) d\mu^*(u) + \int_{\mathcal{S}^d} \log U_{\mu^*}(u) d\mu_{T_n}^* - \int_{\mathcal{S}^d} \log U_{\mu^*}(u) d\mu^* \\
 &= \frac{1}{U^*} \int_{\mathcal{S}^d} U_{\mu^*}(u) d\mu_{T_n}^*(u) + \int_{\mathcal{S}^d} \log U_{\mu^*}(u) d\mu_{T_n}^* - \int_{\mathcal{S}^d} \log U_{\mu^*}(u) d\mu^*,
 \end{aligned}$$

where the inequality follows the boundedness of  $\frac{U_{\mu^* T_n}}{U_{\mu^*}}$  and that  $\mu^*(\{u: U_{\mu^*}(u) > U^*\}) = 0$ .

Taking the limit of  $n \rightarrow \infty$  on both sides, we have

$$\begin{aligned} 1 &= \lim_{n \rightarrow \infty} 1 \geq \frac{1}{U^*} \lim_{n \rightarrow \infty} \int_{\mathcal{S}^d} U_{\mu^* T_n}(u) d\mu_{T_n}^*(u) + \lim_{n \rightarrow \infty} \int_{\mathcal{S}^d} \log U_{\mu^* T_n}(u) d\mu_{T_n}^*(u) - \int_{\mathcal{S}^d} \log U_{\mu^*}(u) d\mu^*(u) \\ &= 1 + \log U^* - \int_{\mathcal{S}^d} \log U_{\mu^*}(u) d\mu^*(u) \\ &\geq 1 + \log U^* - \log \int_{\mathcal{S}^d} U_{\mu^*}(u) d\mu^*(u) \\ &\geq 1, \end{aligned}$$

where the last inequality holds because the supremum taken over  $\mathcal{T} \supset \{\mathcal{S}^d\}$ .

Since  $1 = 1$ , all inequalities must be equalities. In particular,

$$\int_{\mathcal{S}^d} \log U_{\mu^*}(u) d\mu^*(u) = \log \int_{\mathcal{S}^d} U_{\mu^*}(u) d\mu^*(u).$$

That is, for any solution  $\mu^*$  of Equation (7),  $U_{\mu^*}$  must be constant  $\mu^*$ -almost surely.

### 3. We show that $\sigma_d$ is the unique minimizer of the relaxed problem in Equation (7).

Let  $S \subset \mathcal{M}(\mathcal{S}^d)$  be the set of measures where the above property holds:

$$S \triangleq \{\mu \in \mathcal{M}(\mathcal{S}^d): U_\mu \text{ is constant } \mu\text{-almost surely}\}.$$

The problem in Equation (7) is thus equivalent to minimizing over  $S$ :

$$\begin{aligned} \arg \min_{\mu \in \mathcal{M}(\mathcal{S}^d)} \int_{\mathcal{S}^d} \log U_\mu(u) d\mu(u) &= \arg \min_{\mu \in S} \int_{\mathcal{S}^d} \log U_\mu(u) d\mu(u) \\ &= \arg \min_{\mu \in S} \log \int_{\mathcal{S}^d} U_\mu(u) d\mu(u) \\ &= \arg \min_{\mu \in S} \log \int_{\mathcal{S}^d} \int_{\mathcal{S}^d} e^{u^\top v / \tau} d\mu(v) d\mu(u) \\ &= \arg \min_{\mu \in S} \left( \frac{1}{\tau} + \log \int_{\mathcal{S}^d} \int_{\mathcal{S}^d} e^{-\frac{1}{2\tau} \|u-v\|^2} d\mu(v) d\mu(u) \right) \\ &= \arg \min_{\mu \in S} \int_{\mathcal{S}^d} \int_{\mathcal{S}^d} G_{\frac{1}{2\tau}}(u, v) d\mu(v) d\mu(u). \end{aligned}$$

By Proposition 1 and  $\tau > 0$ , we know that the uniform distribution  $\sigma_d$  is the unique solution to

$$\arg \min_{\mu \in \mathcal{M}(\mathcal{S}^d)} \int_{\mathcal{S}^d} \int_{\mathcal{S}^d} G_{\frac{1}{2\tau}}(u, v) d\mu(v) d\mu(u). \quad (10)$$

Since  $\sigma_d \in S$ , it must also be the unique solution to Equation (7).

Finally, if perfectly uniform encoders exist,  $\sigma_d$  is realizable, and they are the exact encoders that realize it. Hence, in such cases, they are the exact minimizers of

$$\min_f \mathbb{E}_{x \sim p_{\text{data}}} \left[ \log \mathbb{E}_{x^- \sim p_{\text{data}}} \left[ e^{f(x^-)^\top f(x) / \tau} \right] \right].$$

□

**Relation between Theorem 1,  $\mathcal{L}_{\text{align}}$  and  $\mathcal{L}_{\text{uniform}}$ .** The first term of Equation (2) is equivalent with  $\mathcal{L}_{\text{align}}$  when  $\alpha = 2$ , up to a constant and a scaling. In the above proof, we showed that the second term favors uniformity, via the feature distribution that minimizes the pairwise Gaussian kernel (see Equation (10)):

$$\arg \min_{\mu \in \mathcal{M}(\mathcal{S}^d)} \int_{\mathcal{S}^d} \int_{\mathcal{S}^d} G_{\frac{1}{2\tau}}(u, v) d\mu(v) d\mu(u), \quad (11)$$

which can be alternatively viewed as the relaxed problem of optimizing for the uniformity loss  $\mathcal{L}_{\text{uniform}}$ :

$$\arg \min_f \mathcal{L}_{\text{uniform}}(f; \frac{1}{2\tau}) = \arg \min_f \mathbb{E}_{x, y \sim p_{\text{data}}^{\text{i.i.d.}}} \left[ G_{\frac{1}{2\tau}}(f(x), f(y)) \right]. \quad (12)$$

The relaxation comes from the observation that Equation (11) minimizes over all feature distributions on  $\mathcal{S}^d$ , while Equation (12) only considers the realizable ones.

**Relation between Equation (7) and minimizing average pairwise Gaussian potential (i.e., minimizing  $\mathcal{L}_{\text{uniform}}$ ).** In view of the Proposition 1 and the proof of Theorem 1, we know that the uniform distribution  $\sigma_d$  is the unique minimizer of both of the following problems:

$$\begin{aligned} \{\sigma_d\} &= \min_{\mu \in \mathcal{M}(\mathcal{S}^d)} \log \int_{\mathcal{S}^d} \int_{\mathcal{S}^d} e^{u^\top v / \tau} d\mu(v) d\mu(u), \\ \{\sigma_d\} &= \min_{\mu \in \mathcal{M}(\mathcal{S}^d)} \int_{\mathcal{S}^d} \log \int_{\mathcal{S}^d} e^{u^\top v / \tau} d\mu(v) d\mu(u). \end{aligned}$$

So pushing the log inside the outer integral doesn't change the solution. However, if we push the log all the way inside the inner integral, the problem becomes equivalent with minimizing the norm of the mean, i.e.,

$$\min_{\mu \in \mathcal{M}(\mathcal{S}^d)} \mathbb{E}_{U \sim \mu} [U]^\top \mathbb{E}_{U \sim \mu} [U],$$

which is minimized for any distribution with mean being the all-zeros vector 0, e.g.,  $\frac{1}{2}\delta_u + \frac{1}{2}\delta_{-u}$  for any  $u \in \mathcal{S}^d$  (where  $\delta_u$  is the Dirac delta distribution at  $u$  s.t.  $\delta_u(S) = \mathbb{1}_S(u)$ ,  $\forall S \in \mathcal{B}(\mathcal{S}^d)$ ). Therefore, the location of the log is important.

**Theorem 1 (Single negative sample).** *If perfectly aligned and uniform encoders exist, they form the exact minimizers of the contrastive loss  $\mathcal{L}_{\text{contrastive}}(f; \tau, M)$  for fixed  $\tau > 0$  and  $M = 1$ .*

*Proof of Theorem 1.* Since  $M = 1$ , we have

$$\begin{aligned} \mathcal{L}_{\text{contrastive}}(f; \tau, 1) &= \mathbb{E}_{\substack{(x, y) \sim p_{\text{pos}} \\ x^- \sim p_{\text{data}}}} \left[ -\frac{1}{\tau} f(x)^\top f(y) + \log \left( e^{f(x)^\top f(y) / \tau} + e^{f(x^-)^\top f(x) / \tau} \right) \right] \\ &\geq \mathbb{E}_{\substack{x \sim p_{\text{data}} \\ x^- \sim p_{\text{data}}}} \left[ -\frac{1}{\tau} + \log \left( e^{1/\tau} + e^{f(x^-)^\top f(x) / \tau} \right) \right] \end{aligned} \quad (13)$$

$$\begin{aligned} &\geq -\frac{1}{\tau} + \min_{\mu \in \mathcal{M}(\mathcal{S}^d)} \int_{\mathcal{S}^d} \int_{\mathcal{S}^d} \log \left( e^{1/\tau} + e^{u^\top v / \tau} \right) d\mu(u) d\mu(v) \\ &= -\frac{1}{\tau} + \min_{\mu \in \mathcal{M}(\mathcal{S}^d)} \int_{\mathcal{S}^d} \int_{\mathcal{S}^d} \log \left( e^{1/\tau} + e^{(2 - \|u-v\|_2^2) / (2\tau)} \right) d\mu(u) d\mu(v). \end{aligned} \quad (14)$$

By the definition of perfect alignment, the equality in Equation (13) is satisfied iff  $f$  is perfectly aligned.

Consider the function  $f: (0, 4] \rightarrow \mathbb{R}_+$  defined as

$$f(t) = \log \left( e^{\frac{1}{\tau}} + e^{\frac{2-t}{2\tau}} \right).$$

It has the following properties:



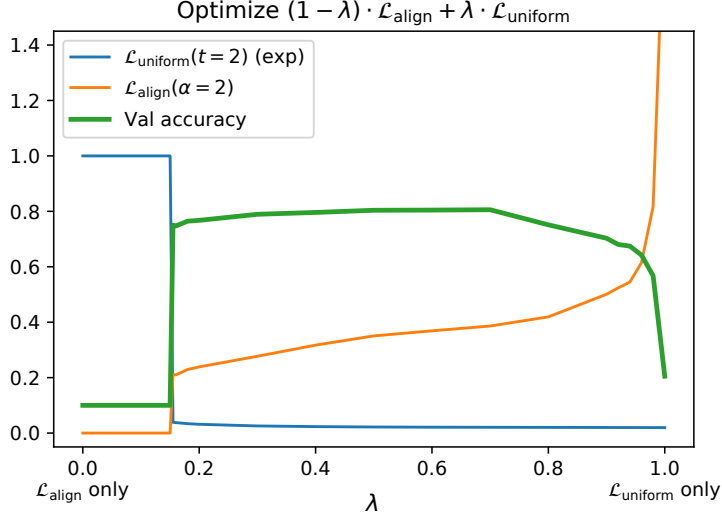

Figure 1: Effect of optimizing different weighted combinations of  $\mathcal{L}_{\text{align}}(\alpha=2)$  and  $\mathcal{L}_{\text{uniform}}(t=2)$  for STL-10. For each encoder, we show the  $\mathcal{L}_{\text{align}}$  and  $\mathcal{L}_{\text{uniform}}$  metrics, and validation accuracy of a linear classifier trained on encoder outputs.  $\mathcal{L}_{\text{uniform}}$  is exponentiated for plotting purposes.

- $-f'(t) = \frac{1}{2\tau} \frac{e^{-\frac{t}{2\tau}}}{1+e^{-\frac{t}{2\tau}}} = \frac{1}{2\tau}(1 - (1 + e^{-\frac{t}{2\tau}})^{-1})$  is strictly completely monotone on  $(0, +\infty)$ :  
 $\forall t \in (0, +\infty),$

$$\frac{1}{2\tau}(1 - (1 + e^{-\frac{t}{2\tau}})^{-1}) > 0$$

$$(-1)^n \frac{d^n}{dt^n} \frac{1}{2\tau}(1 - (1 + e^{-\frac{t}{2\tau}})^{-1}) = \frac{n!}{(2\tau)^{n+1}}(1 + e^{-\frac{t}{2\tau}})^{-(n+1)} > 0, \quad n = 1, 2, \dots$$

- $f$  is bounded on  $(0, 4]$ .

In view of Lemma 2, we have that the equality in Equation (14) is satisfied iff the feature distribution induced by  $f$  (i.e., the pushforward measure  $p_{\text{data}} \circ f^{-1}$ ) is  $\sigma_d$ , that is, in other words,  $f$  is perfectly uniform.

Therefore,

$$\mathcal{L}_{\text{contrastive}}(f; \tau, 1) \geq -\frac{1}{\tau} + \int_{\mathcal{S}^d} \int_{\mathcal{S}^d} \log(e^{1/\tau} + e^{u^T v / \tau}) d\sigma_d(u) d\sigma_d(v) = \text{constant independent of } f,$$

where equality is satisfied iff  $f$  is perfectly aligned and uniform. This concludes the proof.  $\square$

**Difference between conditions of Theorems 1 and 1.** We remark that the statement in Theorem 1 is weaker than the previous Theorem 1. Theorem 1 is conditioned on the existence perfectly aligned and uniform encoders. It only shows that  $\mathcal{L}_{\text{contrastive}}(f; \tau, M = 1)$  favors alignment under the condition that perfect uniformity is realizable, and vice versa. In Theorem 1,  $\mathcal{L}_{\text{contrastive}}$  decomposes into two terms, each favoring alignment and uniformity. Therefore, the decomposition in Theorem 1 is exempt from this constraint.

## S-2. Additional Experiment Results

**Both alignment and uniformity are necessary for a good representation.** Figure 1 shows how the final encoder changes in response to optimizing differently weighted combinations of  $\mathcal{L}_{\text{align}}$  and  $\mathcal{L}_{\text{uniform}}$  on STL-10. The trade-off between the  $\mathcal{L}_{\text{align}}$  and  $\mathcal{L}_{\text{uniform}}$  indicates that perfect alignment and perfect uniformity are likely hard to simultaneously achieve in practice. However, the inverted-U-shaped accuracy curve confirms that both properties are indeed necessary for a good encoder. When  $\mathcal{L}_{\text{align}}$  is weighted much higher than  $\mathcal{L}_{\text{uniform}}$ , degenerate solution occurs and all inputs are mapped to the same feature vector (exp  $\mathcal{L}_{\text{uniform}} = 1$ ). However, as long as the ratio between two weights is not too large (e.g.,  $< 4$ ), we observe that the representation quality remains relatively good and insensitive to the exact weight choices.

| Operator                    | Input Spatial Shape      | Input #Channel                   | Kernel Size | Stride   | Padding  | Output Spatial Shape | Output #Channel              |
|-----------------------------|--------------------------|----------------------------------|-------------|----------|----------|----------------------|------------------------------|
| Input                       | $[h_{in}, w_{in}]$       | $c_{in}$                         | —           | —        | —        | $[h_{in}, w_{in}]$   | $c_{in}$                     |
| Conv. Transpose + BN + ReLU | $[h_{in}, w_{in}]$       | $c_{in}$                         | 3           | 2        | 1        | $[2h_{in}, 2w_{in}]$ | $\lfloor c_{in}/2 \rfloor$   |
| Conv. Transpose + BN + ReLU | $[2h_{in}, 2w_{in}]$     | $\lfloor c_{in}/2 \rfloor$       | 3           | 2        | 1        | $[4h_{in}, 4w_{in}]$ | $\lfloor c_{in}/4 \rfloor$   |
| $\vdots$                    | $\vdots$                 | $\vdots$                         | $\vdots$    | $\vdots$ | $\vdots$ | $\vdots$             | $\vdots$                     |
| Conv. Transpose + BN + ReLU | $[h_{out}/2, w_{out}/2]$ | $\lfloor c_{in}/2^{n-1} \rfloor$ | 3           | 2        | 1        | $[h_{out}, w_{out}]$ | $\lfloor c_{in}/2^n \rfloor$ |
| Conv.                       | $[h_{out}, w_{out}]$     | $\lfloor c_{in}/2^n \rfloor$     | 3           | 1        | 1        | $[h_{out}, w_{out}]$ | 1                            |

Table 1: NYU-DEPTH-V2 CNN depth predictor architecture. Each Conv. Transpose+BN+ReLU block increases the spatial shape by a factor of 2, where BN denotes Batch Normalization (Ioffe & Szegedy, 2015). A sequence of such blocks computes a tensor of the correct spatial shape, from an input containing intermediate activations of a CNN encoder (which downsamples the input RGB image by a power of 2). A final convolution at the end computes the single-channel depth prediction.

### S-3. Experiment Details

All experiments are performed on 1-4 NVIDIA Titan Xp, Titan X PASCAL, Titan RTX, or 2080 Ti GPUs.

#### S-3.1. CIFAR-10, STL-10 and NYU-DEPTH-V2 Experiments

For CIFAR-10, STL-10 and NYU-DEPTH-V2 experiments, we use the following settings, unless otherwise stated in Tables 3 and 4 below:

- Standard data augmentation procedures are used for generating positive pairs, including resizing, cropping, horizontal flipping, color jittering, and random grayscale conversion. This follows prior empirical work in contrastive representation learning (Wu et al., 2018; Tian et al., 2019; Hjelm et al., 2018; Bachman et al., 2019).
- Neural network architectures follow the corresponding experiments on these datasets in Tian et al. (2019). For NYU-DEPTH-V2 evaluation, the architecture of the depth prediction CNN is described in Table 1.
- We use minibatch stochastic gradient descent (SGD) with 0.9 momentum and 0.0001 weight decay.
- We use linearly scaled learning rate (0.12 per 256 batch size) (Goyal et al., 2017).
  - CIFAR-10 and STL-10: Optimization is done over 200 epochs, with learning rate decayed by a factor of 0.1 at epochs 155, 170, and 185.
  - NYU-DEPTH-V2: Optimization is done over 400 epochs, with learning rate decayed by a factor of 0.1 at epochs 310, 340, and 370.
- Encoders are optimized over the training split. For evaluation, we freeze the encoder, and train classifiers / depth predictors on the training set samples, and test on the validation split.
  - CIFAR-10 and STL-10: We use standard train-val split. Linear classifiers are trained with Adam (Kingma & Ba, 2014) over 100 epochs, with  $\beta_1 = 0.5, \beta_2 = 0.999, \epsilon = 10^{-8}$ , 128 batch size, and an initial learning rate of 0.001, decayed by a factor of 0.2 at epochs 60 and 80.
  - NYU-DEPTH-V2: We use the train-val split on the 1449 labeled images from Nathan Silberman & Fergus (2012). Depth predictors are trained with Adam (Kingma & Ba, 2014) over 120 epochs, with  $\beta_1 = 0.5, \beta_2 = 0.999, \epsilon = 10^{-8}$ , 128 batch size, and an initial learning rate of 0.003, decayed by a factor of 0.2 at epochs 70, 90, 100, and 110.

At each SGD iteration, a minibatch of  $K$  positive pairs is sampled  $\{(x_i, y_i)\}_{i=1}^K$ , and the three losses for this minibatch are calculated as following:

- $\mathcal{L}_{\text{contrastive}}$ : For each  $x_i$ , the sample contrastive loss is taken with the positive being  $y_i$ , and the negatives being  $\{y_j\}_{j \neq i}$ . For each  $y_i$ , the sample loss is computed similarly. The minibatch loss is calculated by aggregating these  $2K$  terms:

$$\frac{1}{2K} \sum_{i=1}^K \log \frac{e^{f(x_i)^\top f(y_i)/\tau}}{\sum_{j=1}^K e^{f(x_i)^\top f(y_j)/\tau}} + \frac{1}{2K} \sum_{i=1}^K \log \frac{e^{f(x_i)^\top f(y_i)/\tau}}{\sum_{j=1}^K e^{f(x_j)^\top f(y_i)/\tau}}.$$

| IMAGENET-100 Classes |           |           |           |           |           |           |           |           |           |
|----------------------|-----------|-----------|-----------|-----------|-----------|-----------|-----------|-----------|-----------|
| n02869837            | n01749939 | n02488291 | n02107142 | n13037406 | n02091831 | n04517823 | n04589890 | n03062245 | n01773797 |
| n01735189            | n07831146 | n07753275 | n03085013 | n04485082 | n02105505 | n01983481 | n02788148 | n03530642 | n04435653 |
| n02086910            | n02859443 | n13040303 | n03594734 | n02085620 | n02099849 | n01558993 | n04493381 | n02109047 | n04111531 |
| n02877765            | n04429376 | n02009229 | n01978455 | n02106550 | n01820546 | n01692333 | n07714571 | n02974003 | n02114855 |
| n03785016            | n03764736 | n03775546 | n02087046 | n07836838 | n04099969 | n04592741 | n03891251 | n02701002 | n03379051 |
| n02259212            | n07715103 | n03947888 | n04026417 | n02326432 | n03637318 | n01980166 | n02113799 | n02086240 | n03903868 |
| n02483362            | n04127249 | n02089973 | n03017168 | n02093428 | n02804414 | n02396427 | n04418357 | n02172182 | n01729322 |
| n02113978            | n03787032 | n02089867 | n02119022 | n03777754 | n04238763 | n02231487 | n03032252 | n02138441 | n02104029 |
| n03837869            | n03494278 | n04136333 | n03794056 | n03492542 | n02018207 | n04067472 | n03930630 | n03584829 | n02123045 |
| n04229816            | n02100583 | n03642806 | n04336792 | n03259280 | n02116738 | n02108089 | n03424325 | n01855672 | n02090622 |

Table 2: 100 randomly selected IMAGENET classes forming the IMAGENET-100 subset. These classes are the same as the ones used by Tian et al. (2019).

This calculation follows empirical practices and is similar to Oord et al. (2018); Hénaff et al. (2019), and *end-to-end* in He et al. (2019).

- $\mathcal{L}_{\text{align}}$ : The minibatch alignment loss is straightforwardly computed as

$$\frac{1}{K} \sum_{i=1}^K \|f(x_i) - f(y_i)\|_2^\alpha.$$

- $\mathcal{L}_{\text{uniform}}$ : The minibatch uniform loss is calculated by considering each pair of  $\{x_i\}_i$  and  $\{y_i\}_i$ :

$$\frac{1}{2} \log \left( \frac{2}{K(K-1)} \sum_{i \neq j} e^{-t\|f(x_i) - f(x_j)\|_2^2} \right) + \frac{1}{2} \log \left( \frac{2}{K(K-1)} \sum_{i \neq j} e^{-t\|f(y_i) - f(y_j)\|_2^2} \right).$$

Tables 3 and 4 below describe the full specifications of all 306 STL-10 and 64 NYU-DEPTH-V2 encoders. These experiment results are visualized in main paper Figure 6, showing a clear connection between representation quality and  $\mathcal{L}_{\text{align}}$  &  $\mathcal{L}_{\text{uniform}}$  metrics.

### S-3.2. IMAGENET-100 and Momentum Contrast (MoCo) Variants

**IMAGENET-100 details.** We use the same IMAGENET-100 sampled by Tian et al. (2019), containing the 100 randomly selected classes listed in Table 2.

**MoCo with  $\mathcal{L}_{\text{align}}$  and  $\mathcal{L}_{\text{uniform}}$ .** At each SGD iteration, let

- $K$  be the minibatch size,
- $\{f(x_i)_i\}_{i=1}^K$  be the batched query features encoded by the current up-to-date encoder  $f$  (i.e.,  $q$  in Algorithm 1 of He et al. (2019)),
- $\{f_{\text{EMA}}(y_i)\}_{i=1}^K$  be the batched key features encoded by the exponential moving average encoder  $f_{\text{EMA}}$  (i.e.,  $k$  in Algorithm 1 of He et al. (2019)),
- $\{\text{queue}_j\}_{j=1}^N$  be the feature queue, where  $N$  is the queue size.

$\mathcal{L}_{\text{align}}$  and  $\mathcal{L}_{\text{uniform}}$  for this minibatch are calculated as following:

- $\mathcal{L}_{\text{align}}$ : The minibatch alignment loss is computed as disparity between features from the two encoders:

$$\frac{1}{K} \sum_{i=1}^K \|f(x_i) - f_{\text{EMA}}(y_i)\|_2^\alpha.$$

- $\mathcal{L}_{\text{uniform}}$ : We experiment with two forms of  $\mathcal{L}_{\text{uniform}}$ :

1. Only computing pairwise distance between  $\{f(x_i)\}_i$  and  $\{\text{queue}_j\}_j$ :

$$\log \left( \frac{1}{NK} \sum_{i=1}^K \sum_{j=1}^N e^{-t \|f(x_i) - \text{queue}_j\|_2^2} \right). \quad (15)$$

2. Also computing pairwise distance inside  $\{f(x_i)\}_i$ :

$$\log \left( \frac{2}{2NK + K(K-1)} \sum_{i=1}^K \sum_{j=1}^N e^{-t \|f(x_i) - \text{queue}_j\|_2^2} + \frac{2}{2NK + K(K-1)} \sum_{i \neq j} e^{-t \|f(x_i) - f(x_j)\|_2^2} \right). \quad (16)$$

Our experiment settings below mostly follow [He et al. \(2019\)](#) and the unofficial implementation by [Tian \(2019\)](#), because the official implementation was not released at the time of performing these analyses:

- Standard data augmentation procedures are used for generating positive pairs, including resizing, cropping, horizontal flipping, color jittering, and random grayscale conversion, following [Tian \(2019\)](#).
- Encoder architecture is ResNet50 ([He et al., 2016](#)).
- We use minibatch stochastic gradient descent (SGD) with 128 batch size, 0.03 initial learning rate, 0.9 momentum and 0.0001 weight decay.
- Optimization is done over 240 epochs, with learning rate decayed by a factor of 0.1 at epochs 120, 160, and 200.
- We use 0.999 exponential moving average factor, following [He et al. \(2019\)](#).
- For evaluation, we freeze the encoder, and train a linear classifier on the training set samples, and test on the validation split. Linear classifiers are trained with minibatch SGD over 60 epochs, with a learning rate of 10, decayed by a factor of 0.2 at epochs 30, 40, and 50.

Table 5 below describes the full specifications of all 45 IMAGENET-100 encoders. These experiment results are visualized in main paper Figure 8a, showing a clear connection between representation quality and  $\mathcal{L}_{\text{align}}$  &  $\mathcal{L}_{\text{uniform}}$  metrics.

### S-3.3. BOOKCORPUS and Quick-Thought Vectors Variants

**BOOKCORPUS details.** Since the original BOOKCORPUS dataset ([Zhu et al., 2015](#)) is not distributed anymore, we use the unofficial code by [Kobayashi \(2019\)](#) to recreate our copy. Our copy ended up containing 52,799,513 training sentences and 50,000 validation sentences, compared to the original copy used by Quick-Thought Vectors ([Logeswaran & Lee, 2018](#)), which contains 45,786,400 training sentences and 50,000 validation sentences.

**Quick-Thought Vectors with  $\mathcal{L}_{\text{align}}$  and  $\mathcal{L}_{\text{uniform}}$ .** With Quick-Thought Vectors, the positive pairs are the neighboring sentences. At each optimization iteration, let

- $\{x_i\}_{i=1}^K$  be the  $K$  consecutive sentences forming this minibatch, where  $K$  be the minibatch size,
- $f$  and  $g$  be the two RNN sentence encoders.

The original Quick-Thought Vectors ([Logeswaran & Lee, 2018](#)) does not  $l_2$ -normalize on encoder outputs during training the encoder. Here we describe the calculation of  $\mathcal{L}_{\text{contrastive}}$ ,  $\mathcal{L}_{\text{align}}$ , and  $\mathcal{L}_{\text{uniform}}$  for  $l_2$ -normalized encoders, in our modified Quick-Thought Vectors method. Note that this does not affect evaluation since features are  $l_2$ -normalized before using in downstream tasks, following the original Quick-Thought Vectors ([Logeswaran & Lee, 2018](#)). For a minibatch, these losses are calculated as following:

- $\mathcal{L}_{\text{contrastive}}$  with temperature:

$$\begin{aligned} & \frac{1}{K} \text{cross\_entropy}(\text{softmax}(\{f(x_1)^\top g(x_j)\}_j), \{0, 1, 0, \dots, 0\}) \\ & + \frac{1}{K} \sum_{i=2}^{K-1} \text{cross\_entropy}(\text{softmax}(\{f(x_i)^\top g(x_j)\}_j), \underbrace{\{0, \dots, 0\}}_{(i-2) \text{ 0's}}, \frac{1}{2}, 0, \frac{1}{2}, \underbrace{\{0, \dots, 0\}}_{(K-i-1) \text{ 0's}}) + \\ & + \frac{1}{K} \text{cross\_entropy}(\text{softmax}(\{f(x_K)^\top g(x_j)\}_j), \{0, \dots, 1, 0\}). \end{aligned}$$

This is almost identical with the original contrastive loss used by Quick-Thought Vectors, except that this does not additionally manually masks out the entries  $f(x_i)^\top g(x_i)$  with zeros, which is unnecessary with  $l_2$ -normalization.

- $\mathcal{L}_{\text{align}}$ : The minibatch alignment loss is computed as disparity between features from the two encoders encoding neighboring sentences (assuming  $K \geq 2$ ):

$$\frac{1}{K} \|f(x_1) - g(x_2)\|_2^\alpha + \frac{1}{2K} \sum_{i=2}^{K-2} (\|f(x_{i-1}) - g(x_i)\|_2^\alpha + \|f(x_i) - g(x_{i+1})\|_2^\alpha) + \frac{1}{K} \|f(x_{K-1}) - g(x_K)\|_2^\alpha.$$

- $\mathcal{L}_{\text{uniform}}$ : We combine the uniformity losses for each of  $f$  and  $g$  by summing them (instead of averaging since  $f$  and  $g$  are two different encoders):

$$\frac{2}{K(K-1)} \sum_{i \neq j} e^{-t\|f(x_i) - f(x_j)\|_2^2} + \frac{2}{K(K-1)} \sum_{i \neq j} e^{-t\|g(x_i) - g(x_j)\|_2^2}.$$

Our experiment settings below mostly the official implementation by [Logeswaran & Lee \(2018\)](#):

- Sentence encoder architecture is bi-directional Gated Recurrent Unit (GRU) ([Cho et al., 2014](#)) with inputs from a 620-dimensional word embedding trained jointly from scratch.
- We use Adam ([Kingma & Ba, 2014](#)) with  $\beta_1 = 0.9, \beta_2 = 0.999, \epsilon = 10^{-8}$ , 400 batch size, 0.0005 constant learning rate, and 0.5 gradient norm clipping.
- Optimization is done during 1 epoch over the training data.
- For evaluation on a binary classification task, we freeze the encoder, and fit a logistic classifier with  $l_2$  regularization on the encoder outputs. A 10-fold cross validation is performed to determine the regularization strength among  $\{1, 2^{-1}, \dots, 2^{-8}\}$ , following [Kiros et al. \(2015\)](#) and [Logeswaran & Lee \(2018\)](#). The classifier is finally tested on the validation split.

Table 6 below describes the full specifications of all 108 BOOKCORPUS encoders along with 6 settings that lead to training instability (i.e., NaN occurring). These experiment results are visualized in main paper Figure 8b, showing a clear connection between representation quality and  $\mathcal{L}_{\text{align}}$  &  $\mathcal{L}_{\text{uniform}}$  metrics. For the unnormalized encoders, the features are normalized before calculated  $\mathcal{L}_{\text{align}}$  and  $\mathcal{L}_{\text{uniform}}$  metrics, since they are nonetheless still normalized before being used in downstream tasks ([Logeswaran & Lee, 2018](#)).

**Understanding Contrastive Representation Learning through Alignment and Uniformity on the Hypersphere**

Table 3: Experiment specifications for all 306 STL-10 encoders. We report the encoder representation quality measured by accuracy of linear and  $k$ -nearest neighbor ( $k$ -NN) with  $k = 5$  classifiers on either encoder outputs or fc7 activations, via both a 5-fold cross validation of the training set and the held out validation set.

For encoder initialization, “rand” refers to standard network initialization, and symbols denote finetuning from a pretrained encoder, obtained via the experiment row marked with the same symbol. Initial learning rates (LRs) are usually either fixed as 0.12 or computed via a linear scaling (0.12 per 256 batch size). Dimensionality (abbreviated as “Dim.”) shows the ambient dimension of the output features, i.e., they live on the unit hypersphere of one less dimension. The last three rows show encoders that are used to initialize finetuning, but are not part of the 285 encoders plotted in main paper Figure 3, due to their unusual batch size of 786. Their accuracy and  $\mathcal{L}_{\text{align}}$  &  $\mathcal{L}_{\text{uniform}}$  metrics follow the same trend shown in Figure 6a.

| Losses                             |                                      |                                | Init. | Epochs | Batch Size | Initial LR | Dim. | Training Set 5-Fold Cross Val. Accuracy $\uparrow$ |               |              |            | Validation Set Accuracy $\uparrow$ |               |              |            |
|------------------------------------|--------------------------------------|--------------------------------|-------|--------|------------|------------|------|----------------------------------------------------|---------------|--------------|------------|------------------------------------|---------------|--------------|------------|
| $\mathcal{L}_{\text{contrastive}}$ | $\mathcal{L}_{\text{align}}$         | $\mathcal{L}_{\text{uniform}}$ |       |        |            |            |      | Output + Linear                                    | Output + 5-NN | fc7 + Linear | fc7 + 5-NN | Output + Linear                    | Output + 5-NN | fc7 + Linear | fc7 + 5-NN |
| —                                  | $1.25 \cdot \mathcal{L}_a(\alpha=2)$ | $\mathcal{L}_u(t=2)$           | rand  | 200    | 2          | 0.0009375  | 128  | —                                                  | —             | —            | —          | 19.31%                             | 22.56%        | 47.58%       | 35.30%     |
| —                                  | $1.25 \cdot \mathcal{L}_a(\alpha=2)$ | $\mathcal{L}_u(t=2)$           | rand  | 200    | 3          | 0.00140625 | 128  | —                                                  | —             | —            | —          | 43.97%                             | 42.89%        | 56.89%       | 47.63%     |
| —                                  | $1.25 \cdot \mathcal{L}_a(\alpha=2)$ | $\mathcal{L}_u(t=2)$           | rand  | 200    | 4          | 0.001875   | 128  | —                                                  | —             | —            | —          | 53.96%                             | 52.89%        | 62.86%       | 55.06%     |
| $\mathcal{L}_c(\tau=0.07)$         | —                                    | —                              | rand  | 200    | 16         | 0.0075     | 128  | —                                                  | —             | —            | —          | 70.46%                             | 70.54%        | 75.54%       | 69.63%     |
| $\mathcal{L}_c(\tau=0.5)$          | —                                    | —                              | rand  | 200    | 16         | 0.0075     | 128  | —                                                  | —             | —            | —          | 69.59%                             | 70.04%        | 76.23%       | 68.38%     |
| —                                  | $\mathcal{L}_a(\alpha=2)$            | $\mathcal{L}_u(t=2)$           | rand  | 200    | 16         | 0.0075     | 128  | —                                                  | —             | —            | —          | 74.68%                             | 74.34%        | 79.06%       | 73.68%     |
| —                                  | $1.25 \cdot \mathcal{L}_a(\alpha=1)$ | $\mathcal{L}_u(t=2)$           | rand  | 200    | 16         | 0.0075     | 128  | —                                                  | —             | —            | —          | 74.75%                             | 73.00%        | 77.84%       | 71.70%     |
| —                                  | $1.25 \cdot \mathcal{L}_a(\alpha=2)$ | $\mathcal{L}_u(t=2)$           | rand  | 200    | 16         | 0.0075     | 128  | —                                                  | —             | —            | —          | 73.93%                             | 74.09%        | 79.25%       | 73.38%     |
| $\mathcal{L}_c(\tau=0.5)$          | —                                    | —                              | rand  | 200    | 16         | 0.12       | 128  | —                                                  | —             | —            | —          | 67.30%                             | 66.36%        | 71.53%       | 66.38%     |
| —                                  | $\mathcal{L}_a(\alpha=2)$            | $\mathcal{L}_u(t=2)$           | rand  | 200    | 16         | 0.12       | 128  | —                                                  | —             | —            | —          | 71.93%                             | 71.24%        | 75.49%       | 69.89%     |
| —                                  | $1.25 \cdot \mathcal{L}_a(\alpha=1)$ | $\mathcal{L}_u(t=2)$           | rand  | 200    | 16         | 0.12       | 128  | —                                                  | —             | —            | —          | 71.85%                             | 70.21%        | 74.65%       | 69.88%     |
| $\mathcal{L}_c(\tau=0.07)$         | —                                    | —                              | rand  | 200    | 32         | 0.015      | 128  | —                                                  | —             | —            | —          | 71.80%                             | 72.04%        | 77.29%       | 70.74%     |
| $\mathcal{L}_c(\tau=0.5)$          | —                                    | —                              | rand  | 200    | 32         | 0.015      | 128  | —                                                  | —             | —            | —          | 73.39%                             | 73.39%        | 79.43%       | 73.85%     |
| —                                  | $\mathcal{L}_a(\alpha=2)$            | $\mathcal{L}_u(t=2)$           | rand  | 200    | 32         | 0.015      | 128  | —                                                  | —             | —            | —          | 78.04%                             | 76.60%        | 82.23%       | 76.04%     |
| —                                  | $1.25 \cdot \mathcal{L}_a(\alpha=1)$ | $\mathcal{L}_u(t=2)$           | rand  | 200    | 32         | 0.015      | 128  | —                                                  | —             | —            | —          | 78.71%                             | 76.45%        | 81.66%       | 76.25%     |
| $\mathcal{L}_c(\tau=0.5)$          | —                                    | —                              | rand  | 200    | 32         | 0.12       | 128  | —                                                  | —             | —            | —          | 70.43%                             | 69.66%        | 74.95%       | 69.69%     |
| —                                  | $\mathcal{L}_a(\alpha=2)$            | $\mathcal{L}_u(t=2)$           | rand  | 200    | 32         | 0.12       | 128  | —                                                  | —             | —            | —          | 75.40%                             | 73.70%        | 78.56%       | 73.21%     |
| —                                  | $1.25 \cdot \mathcal{L}_a(\alpha=1)$ | $\mathcal{L}_u(t=2)$           | rand  | 200    | 32         | 0.12       | 128  | —                                                  | —             | —            | —          | 75.83%                             | 73.95%        | 78.48%       | 73.55%     |
| $\mathcal{L}_c(\tau=0.5)$          | —                                    | —                              | rand  | 200    | 64         | 0.03       | 128  | —                                                  | —             | —            | —          | 74.59%                             | 74.48%        | 80.64%       | 75.52%     |
| —                                  | $\mathcal{L}_a(\alpha=2)$            | $\mathcal{L}_u(t=2)$           | rand  | 200    | 64         | 0.03       | 128  | —                                                  | —             | —            | —          | 79.25%                             | 77.84%        | 82.84%       | 76.53%     |
| —                                  | $\mathcal{L}_a(\alpha=2)$            | $\mathcal{L}_u(t=2)$           | rand  | 200    | 64         | 0.12       | 128  | —                                                  | —             | —            | —          | 77.80%                             | 75.75%        | 81.45%       | 75.49%     |
| —                                  | $1.25 \cdot \mathcal{L}_a(\alpha=1)$ | $\mathcal{L}_u(t=2)$           | rand  | 200    | 64         | 0.12       | 128  | —                                                  | —             | —            | —          | 78.66%                             | 76.19%        | 81.40%       | 75.30%     |
| —                                  | $\mathcal{L}_a(\alpha=2)$            | $\mathcal{L}_u(t=2)$           | rand  | 200    | 64         | 0.03       | 512  | —                                                  | —             | —            | —          | 80.44%                             | 78.05%        | 83.04%       | 77.29%     |
| —                                  | $0.5 \cdot \mathcal{L}_a(\alpha=2)$  | $\mathcal{L}_u(t=2)$           | rand  | 200    | 64         | 0.03       | 1024 | —                                                  | —             | —            | —          | 81.48%                             | 78.49%        | 82.88%       | 77.11%     |
| —                                  | $\mathcal{L}_a(\alpha=2)$            | $\mathcal{L}_u(t=2)$           | rand  | 200    | 64         | 0.03       | 1024 | —                                                  | —             | —            | —          | 80.81%                             | 77.80%        | 83.18%       | 77.15%     |
| $\mathcal{L}_c(\tau=0.07)$         | —                                    | —                              | rand  | 200    | 128        | 0.06       | 128  | —                                                  | —             | —            | —          | 73.14%                             | 73.73%        | 79.90%       | 72.58%     |
| $\mathcal{L}_c(\tau=0.5)$          | —                                    | —                              | rand  | 200    | 128        | 0.06       | 128  | —                                                  | —             | —            | —          | 75.26%                             | 74.88%        | 80.98%       | 75.36%     |
| —                                  | $\mathcal{L}_a(\alpha=2)$            | $\mathcal{L}_u(t=2)$           | rand  | 200    | 128        | 0.06       | 128  | —                                                  | —             | —            | —          | 79.55%                             | 78.09%        | 83.39%       | 76.96%     |
| $\mathcal{L}_c(\tau=0.07)$         | —                                    | —                              | rand  | 200    | 128        | 0.12       | 128  | —                                                  | —             | —            | —          | 73.11%                             | 73.84%        | 78.44%       | 72.11%     |
| $\mathcal{L}_c(\tau=0.5)$          | —                                    | —                              | rand  | 200    | 128        | 0.12       | 128  | —                                                  | —             | —            | —          | 75.65%                             | 74.80%        | 80.74%       | 74.58%     |
| $\mathcal{L}_c(\tau=0.687)$        | —                                    | —                              | rand  | 200    | 128        | 0.12       | 128  | —                                                  | —             | —            | —          | 74.13%                             | 73.14%        | 79.81%       | 74.10%     |
| —                                  | —                                    | $\mathcal{L}_u(t=2)$           | rand  | 200    | 128        | 0.12       | 128  | —                                                  | —             | —            | —          | 79.05%                             | 76.61%        | 81.77%       | 73.83%     |
| —                                  | $\mathcal{L}_a(\alpha=2)$            | $\mathcal{L}_u(t=2)$           | rand  | 200    | 128        | 0.12       | 128  | —                                                  | —             | —            | —          | 79.74%                             | 77.78%        | 82.70%       | 75.23%     |
| —                                  | $1.25 \cdot \mathcal{L}_a(\alpha=1)$ | $\mathcal{L}_u(t=2)$           | rand  | 200    | 128        | 0.12       | 128  | —                                                  | —             | —            | —          | 80.19%                             | 77.91%        | 82.75%       | 75.91%     |
| —                                  | $0.75 \cdot \mathcal{L}_a(\alpha=2)$ | $\mathcal{L}_u(t=2)$           | rand  | 200    | 256        | 0.12       | 64   | —                                                  | —             | —            | —          | 78.40%                             | 78.26%        | 83.46%       | 76.25%     |
| $\mathcal{L}_c(\tau=0.07)$         | —                                    | —                              | rand  | 200    | 256        | 0.12       | 128  | —                                                  | —             | —            | —          | 75.23%                             | 75.86%        | 80.64%       | 73.56%     |
| $\mathcal{L}_c(\tau=0.5)$          | —                                    | —                              | rand  | 200    | 256        | 0.12       | 128  | —                                                  | —             | —            | —          | 76.09%                             | 75.81%        | 81.49%       | 75.52%     |
| $\mathcal{L}_c(\tau=0.6)$          | —                                    | —                              | rand  | 200    | 256        | 0.12       | 128  | —                                                  | —             | —            | —          | 75.61%                             | 74.56%        | 81.09%       | 75.36%     |
| —                                  | —                                    | $\mathcal{L}_u(t=2)$           | rand  | 200    | 256        | 0.12       | 128  | —                                                  | —             | —            | —          | 79.94%                             | 77.95%        | 82.66%       | 73.65%     |
| —                                  | $0.75 \cdot \mathcal{L}_a(\alpha=2)$ | $\mathcal{L}_u(t=2)$           | rand  | 200    | 256        | 0.12       | 128  | —                                                  | —             | —            | —          | 80.54%                             | 78.55%        | 83.54%       | 76.81%     |
| —                                  | $\mathcal{L}_a(\alpha=2)$            | $\mathcal{L}_u(t=2)$           | rand  | 200    | 256        | 0.12       | 128  | —                                                  | —             | —            | —          | 80.76%                             | 78.57%        | 84.24%       | 76.60%     |
| $\Delta$ —                         | $1.25 \cdot \mathcal{L}_a(\alpha=1)$ | $\mathcal{L}_u(t=2)$           | rand  | 200    | 256        | 0.12       | 256  | —                                                  | —             | —            | —          | 81.29%                             | 78.49%        | 83.55%       | 74.08%     |
| —                                  | $0.5 \cdot \mathcal{L}_a(\alpha=2)$  | $\mathcal{L}_u(t=2)$           | rand  | 200    | 256        | 0.12       | 256  | —                                                  | —             | —            | —          | 81.79%                             | 79.13%        | 84.11%       | 76.60%     |
| —                                  | $0.75 \cdot \mathcal{L}_a(\alpha=2)$ | $\mathcal{L}_u(t=2)$           | rand  | 200    | 256        | 0.12       | 256  | —                                                  | —             | —            | —          | 81.48%                             | 79.61%        | 83.86%       | 76.79%     |
| —                                  | $\mathcal{L}_a(\alpha=2)$            | $\mathcal{L}_u(t=2)$           | rand  | 200    | 256        | 0.12       | 256  | —                                                  | —             | —            | —          | 80.95%                             | 78.74%        | 83.69%       | 77.11%     |
| —                                  | $\mathcal{L}_a(\alpha=2)$            | $\mathcal{L}_u(t=2)$           | rand  | 200    | 256        | 0.12       | 512  | —                                                  | —             | —            | —          | 81.33%                             | 78.76%        | 83.81%       | 76.88%     |
| —                                  | $0.5 \cdot \mathcal{L}_a(\alpha=2)$  | $\mathcal{L}_u(t=2)$           | rand  | 200    | 360        | 0.16875    | 8192 | —                                                  | —             | —            | —          | 82.49%                             | 78.96%        | 83.86%       | 76.68%     |
| —                                  | $0.5 \cdot \mathcal{L}_a(\alpha=2)$  | $\mathcal{L}_u(t=2)$           | rand  | 200    | 512        | 0.24       | 4096 | —                                                  | —             | —            | —          | 82.34%                             | 78.84%        | 84.06%       | 75.74%     |
| $\mathcal{L}_c(\tau=0.07)$         | —                                    | —                              | rand  | 200    | 768        | 0.36       | 2    | —                                                  | —             | —            | —          | 29.46%                             | 25.50%        | 59.95%       | 52.83%     |











## Understanding Contrastive Representation Learning through Alignment and Uniformity on the Hypersphere

---

|   |                         |                                   |                              |      |     |     |      |     |   |   |   |   |        |        |        |        |
|---|-------------------------|-----------------------------------|------------------------------|------|-----|-----|------|-----|---|---|---|---|--------|--------|--------|--------|
|   | —                       | $2 \cdot \mathcal{L}_a(\alpha=2)$ | $2 \cdot \mathcal{L}_u(t=2)$ | ★    | 12  | 768 | 0.36 | 128 | — | — | — | — | 61.93% | 60.78% | 68.54% | 60.18% |
| ◇ | $\mathcal{L}_c(\tau=1)$ | —                                 | —                            | rand | 200 | 786 | 0.12 | 128 | — | — | — | — | 70.35% | 70.11% | 80.41% | 73.15% |
| ♣ | $\mathcal{L}_c(\tau=2)$ | —                                 | —                            | rand | 200 | 786 | 0.12 | 128 | — | — | — | — | 64.19% | 62.38% | 78.11% | 68.77% |
| ♠ | $\mathcal{L}_c(\tau=3)$ | —                                 | —                            | rand | 200 | 786 | 0.12 | 128 | — | — | — | — | 55.04% | 53.94% | 74.95% | 64.04% |

**Understanding Contrastive Representation Learning through Alignment and Uniformity on the Hypersphere**

Table 4: Experiment specifications for all 64 NYU-DEPTH-V2 encoders. We report the encoder representation quality measured by mean squared error (MSE) of a CNN depth predictor trained on conv5 or conv4 activations, via both a 5-fold cross validation of the training set and the held out validation set.

All encoders in this table use standard network initialization (denoted as “rand”). Dimensionality (abbreviated as “Dim.”) shows the ambient dimension of the output features, i.e., they live on the unit hypersphere of one less dimension.

| Losses                               |                                       |                                   | Init. | Epochs | Batch Size | Initial LR | Dim. | Training Set 5-Fold Cross Val. MSE ↓ |               | Validation Set MSE ↓ |               |
|--------------------------------------|---------------------------------------|-----------------------------------|-------|--------|------------|------------|------|--------------------------------------|---------------|----------------------|---------------|
| $\mathcal{L}_{\text{contrastive}}$   | $\mathcal{L}_{\text{align}}$          | $\mathcal{L}_{\text{uniform}}$    |       |        |            |            |      | conv5                                | conv4         | conv5                | conv4         |
| —                                    | $0.5 \cdot \mathcal{L}_a(\alpha=2)$   | $\mathcal{L}_u(t=2)$              | rand  | 400    | 128        | 0.06       | 128  | 0.7405                               | 0.7979        | 0.7378               | 0.7969        |
| $\mathcal{L}_c(\tau=0.25)$           | —                                     | —                                 | rand  | 400    | 128        | 0.06       | 128  | 0.7188                               | 0.7747        | 0.7259               | 0.7761        |
| —                                    | $4.375 \cdot \mathcal{L}_a(\alpha=2)$ | $\mathcal{L}_u(t=2)$              | rand  | 400    | 128        | 0.06       | 128  | 0.8039                               | 0.8297        | 0.8032               | 0.8281        |
| —                                    | $3.625 \cdot \mathcal{L}_a(\alpha=1)$ | $\mathcal{L}_u(t=2)$              | rand  | 400    | 128        | 0.06       | 128  | 0.7290                               | 0.7775        | 0.7303               | 0.7749        |
| —                                    | $\mathcal{L}_a(\alpha=2)$             | $\mathcal{L}_u(t=2)$              | rand  | 400    | 128        | 0.06       | 128  | 0.7121                               | 0.7689        | 0.7191               | 0.7725        |
| —                                    | $3.5 \cdot \mathcal{L}_a(\alpha=2)$   | $\mathcal{L}_u(t=2)$              | rand  | 400    | 128        | 0.06       | 128  | 0.7270                               | 0.7741        | 0.7260               | 0.7772        |
| $\mathcal{L}_c(\tau=4)$              | —                                     | —                                 | rand  | 400    | 128        | 0.06       | 128  | 0.7592                               | 0.8195        | 0.7598               | 0.8175        |
| —                                    | $\mathcal{L}_a(\alpha=2)$             | $0.3333 \cdot \mathcal{L}_u(t=2)$ | rand  | 400    | 128        | 0.06       | 128  | 0.7165                               | 0.7697        | 0.7215               | 0.7693        |
| —                                    | $2 \cdot \mathcal{L}_a(\alpha=2)$     | $\mathcal{L}_u(t=2)$              | rand  | 400    | 128        | 0.06       | 128  | 0.7300                               | 0.7669        | 0.7226               | 0.7699        |
| $\mathcal{L}_c(\tau=0.05)$           | —                                     | —                                 | rand  | 400    | 128        | 0.06       | 128  | 0.7170                               | 0.7672        | 0.7206               | 0.7637        |
| $\mathcal{L}_c(\tau=1)$              | —                                     | —                                 | rand  | 400    | 128        | 0.06       | 128  | 0.7505                               | 0.7958        | 0.7560               | 0.7965        |
| —                                    | $0.5 \cdot \mathcal{L}_a(\alpha=2)$   | $7.5 \cdot \mathcal{L}_u(t=2)$    | rand  | 400    | 128        | 0.06       | 128  | 0.8188                               | 0.8556        | 0.8302               | 0.8590        |
| —                                    | $1.25 \cdot \mathcal{L}_a(\alpha=2)$  | $0.5 \cdot \mathcal{L}_u(t=2)$    | rand  | 400    | 128        | 0.06       | 128  | 0.7237                               | 0.7788        | 0.7224               | 0.7806        |
| —                                    | $4.625 \cdot \mathcal{L}_a(\alpha=1)$ | $\mathcal{L}_u(t=2)$              | rand  | 400    | 128        | 0.06       | 128  | 0.8692                               | 0.8820        | 0.8724               | 0.8840        |
| —                                    | $3.375 \cdot \mathcal{L}_a(\alpha=2)$ | $\mathcal{L}_u(t=2)$              | rand  | 400    | 128        | 0.06       | 128  | 0.7663                               | 0.7935        | 0.7691               | 0.7938        |
| —                                    | $0.75 \cdot \mathcal{L}_a(\alpha=2)$  | $0.5 \cdot \mathcal{L}_u(t=2)$    | rand  | 400    | 128        | 0.06       | 128  | <b>0.7008</b>                        | 0.7621        | <b>0.7014</b>        | 0.7592        |
| —                                    | $\mathcal{L}_a(\alpha=2)$             | $0.25 \cdot \mathcal{L}_u(t=2)$   | rand  | 400    | 128        | 0.06       | 128  | 0.7293                               | 0.7997        | 0.7313               | 0.8013        |
| $\mathcal{L}_c(\tau=0.07)$           | —                                     | —                                 | rand  | 400    | 128        | 0.06       | 128  | 0.7079                               | <b>0.7468</b> | 0.7105               | <b>0.7460</b> |
| $\mathcal{L}_c(\tau=0.005)$          | —                                     | —                                 | rand  | 400    | 128        | 0.06       | 128  | 0.7608                               | 0.8109        | 0.7633               | 0.8149        |
| —                                    | $4 \cdot \mathcal{L}_a(\alpha=2)$     | $\mathcal{L}_u(t=2)$              | rand  | 400    | 128        | 0.06       | 128  | 0.7721                               | 0.8195        | 0.7737               | 0.8190        |
| —                                    | $1.5 \cdot \mathcal{L}_a(\alpha=1)$   | $\mathcal{L}_u(t=2)$              | rand  | 400    | 128        | 0.06       | 128  | 0.7231                               | 0.7810        | 0.7193               | 0.7889        |
| —                                    | $\mathcal{L}_a(\alpha=2)$             | $0.5 \cdot \mathcal{L}_u(t=2)$    | rand  | 400    | 128        | 0.06       | 128  | 0.7044                               | 0.7714        | 0.7047               | 0.7718        |
| —                                    | $0.5 \cdot \mathcal{L}_a(\alpha=2)$   | $0.5 \cdot \mathcal{L}_u(t=2)$    | rand  | 400    | 128        | 0.06       | 128  | 0.7329                               | 0.7751        | 0.7454               | 0.7786        |
| —                                    | $2.5 \cdot \mathcal{L}_a(\alpha=1)$   | $\mathcal{L}_u(t=2)$              | rand  | 400    | 128        | 0.06       | 128  | 0.7295                               | 0.7747        | 0.7304               | 0.7785        |
| —                                    | $4.125 \cdot \mathcal{L}_a(\alpha=2)$ | $\mathcal{L}_u(t=2)$              | rand  | 400    | 128        | 0.06       | 128  | 0.7497                               | 0.8129        | 0.7478               | 0.8128        |
| —                                    | $0.125 \cdot \mathcal{L}_a(\alpha=2)$ | $2.5 \cdot \mathcal{L}_u(t=2)$    | rand  | 400    | 128        | 0.06       | 128  | 0.8109                               | 0.8535        | 0.8092               | 0.8523        |
| —                                    | $1.25 \cdot \mathcal{L}_a(\alpha=2)$  | $\mathcal{L}_u(t=2)$              | rand  | 400    | 128        | 0.06       | 128  | 0.7509                               | 0.7892        | 0.7324               | 0.7926        |
| —                                    | $3.75 \cdot \mathcal{L}_a(\alpha=2)$  | $\mathcal{L}_u(t=2)$              | rand  | 400    | 128        | 0.06       | 128  | 0.7514                               | 0.8005        | 0.7531               | 0.8003        |
| —                                    | $2.25 \cdot \mathcal{L}_a(\alpha=2)$  | $\mathcal{L}_u(t=2)$              | rand  | 400    | 128        | 0.06       | 128  | 0.7360                               | 0.7706        | 0.7413               | 0.7747        |
| —                                    | $4.875 \cdot \mathcal{L}_a(\alpha=1)$ | $\mathcal{L}_u(t=2)$              | rand  | 400    | 128        | 0.06       | 128  | 0.8699                               | 0.8882        | 0.8717               | 0.8918        |
| —                                    | $3.125 \cdot \mathcal{L}_a(\alpha=2)$ | $\mathcal{L}_u(t=2)$              | rand  | 400    | 128        | 0.06       | 128  | 0.7203                               | 0.7713        | 0.7138               | 0.7682        |
| —                                    | $1.5 \cdot \mathcal{L}_a(\alpha=2)$   | $\mathcal{L}_u(t=2)$              | rand  | 400    | 128        | 0.06       | 128  | 0.7261                               | 0.7744        | 0.7259               | 0.7715        |
| $\mathcal{L}_c(\tau=0.5)$            | —                                     | —                                 | rand  | 400    | 128        | 0.06       | 128  | 0.7334                               | 0.7743        | 0.7293               | 0.7701        |
| —                                    | $\mathcal{L}_a(\alpha=2)$             | $0.2857 \cdot \mathcal{L}_u(t=2)$ | rand  | 400    | 128        | 0.06       | 128  | 0.7456                               | 0.8070        | 0.7423               | 0.8030        |
| —                                    | $2.5 \cdot \mathcal{L}_a(\alpha=2)$   | $\mathcal{L}_u(t=2)$              | rand  | 400    | 128        | 0.06       | 128  | 0.7289                               | 0.7591        | 0.7250               | 0.7597        |
| —                                    | $0.5 \cdot \mathcal{L}_a(\alpha=2)$   | $3 \cdot \mathcal{L}_u(t=2)$      | rand  | 400    | 128        | 0.06       | 128  | 0.7819                               | 0.8352        | 0.7808               | 0.8314        |
| —                                    | $0.5 \cdot \mathcal{L}_a(\alpha=2)$   | $10 \cdot \mathcal{L}_u(t=2)$     | rand  | 400    | 128        | 0.06       | 128  | 0.8422                               | 0.8896        | 0.8430               | 0.8857        |
| —                                    | $3 \cdot \mathcal{L}_a(\alpha=2)$     | $\mathcal{L}_u(t=2)$              | rand  | 400    | 128        | 0.06       | 128  | 0.7203                               | 0.7642        | 0.7160               | 0.7643        |
| —                                    | $3.875 \cdot \mathcal{L}_a(\alpha=2)$ | $\mathcal{L}_u(t=2)$              | rand  | 400    | 128        | 0.06       | 128  | 0.7477                               | 0.7980        | 0.7476               | 0.7960        |
| $\mathcal{L}_c(\tau=0.4)$            | —                                     | —                                 | rand  | 400    | 128        | 0.06       | 128  | 0.7181                               | 0.7628        | 0.7163               | 0.7651        |
| —                                    | $0.75 \cdot \mathcal{L}_a(\alpha=1)$  | $\mathcal{L}_u(t=2)$              | rand  | 400    | 128        | 0.06       | 128  | 0.7670                               | 0.8225        | 0.7700               | 0.8224        |
| —                                    | $1.25 \cdot \mathcal{L}_a(\alpha=1)$  | $\mathcal{L}_u(t=2)$              | rand  | 400    | 128        | 0.06       | 128  | 0.7311                               | 0.7922        | 0.7265               | 0.7942        |
| —                                    | $1.75 \cdot \mathcal{L}_a(\alpha=2)$  | $0.5 \cdot \mathcal{L}_u(t=2)$    | rand  | 400    | 128        | 0.06       | 128  | 0.7323                               | 0.7900        | 0.7297               | 0.7884        |
| —                                    | $4.5 \cdot \mathcal{L}_a(\alpha=2)$   | $\mathcal{L}_u(t=2)$              | rand  | 400    | 128        | 0.06       | 128  | 0.7592                               | 0.8350        | 0.7585               | 0.8297        |
| —                                    | $0.5 \cdot \mathcal{L}_a(\alpha=2)$   | $5 \cdot \mathcal{L}_u(t=2)$      | rand  | 400    | 128        | 0.06       | 128  | 0.7909                               | 0.8517        | 0.7891               | 0.8526        |
| $0.5 \cdot \mathcal{L}_c(\tau=0.07)$ | —                                     | —                                 | rand  | 400    | 128        | 0.06       | 128  | 0.7068                               | 0.7594        | 0.7028               | 0.7624        |
| —                                    | $3.75 \cdot \mathcal{L}_a(\alpha=1)$  | $\mathcal{L}_u(t=2)$              | rand  | 400    | 128        | 0.06       | 128  | 0.7352                               | 0.7853        | 0.7294               | 0.7817        |
| —                                    | $3.125 \cdot \mathcal{L}_a(\alpha=1)$ | $\mathcal{L}_u(t=2)$              | rand  | 400    | 128        | 0.06       | 128  | 0.7152                               | 0.7661        | 0.7060               | 0.7667        |
| —                                    | $3.625 \cdot \mathcal{L}_a(\alpha=2)$ | $\mathcal{L}_u(t=2)$              | rand  | 400    | 128        | 0.06       | 128  | 0.7420                               | 0.7925        | 0.7505               | 0.7970        |
| —                                    | $5 \cdot \mathcal{L}_a(\alpha=2)$     | $\mathcal{L}_u(t=2)$              | rand  | 400    | 128        | 0.06       | 128  | 0.8072                               | 0.8631        | 0.8084               | 0.8617        |
| $\mathcal{L}_c(\tau=0.1)$            | —                                     | —                                 | rand  | 400    | 128        | 0.06       | 128  | 0.7074                               | 0.7539        | 0.7124               | 0.7491        |
| —                                    | $1.5 \cdot \mathcal{L}_a(\alpha=2)$   | $0.5 \cdot \mathcal{L}_u(t=2)$    | rand  | 400    | 128        | 0.06       | 128  | 0.7255                               | 0.7793        | 0.7199               | 0.7765        |
| —                                    | $7.5 \cdot \mathcal{L}_a(\alpha=2)$   | $\mathcal{L}_u(t=2)$              | rand  | 400    | 128        | 0.06       | 128  | 0.8160                               | 0.8512        | 0.8131               | 0.8505        |
| —                                    | $4.75 \cdot \mathcal{L}_a(\alpha=2)$  | $\mathcal{L}_u(t=2)$              | rand  | 400    | 128        | 0.06       | 128  | 0.8102                               | 0.8633        | 0.8084               | 0.8721        |

## Understanding Contrastive Representation Learning through Alignment and Uniformity on the Hypersphere

---

|                                     |                                       |                                |      |     |     |      |     |        |        |        |        |
|-------------------------------------|---------------------------------------|--------------------------------|------|-----|-----|------|-----|--------|--------|--------|--------|
| —                                   | $0.5 \cdot \mathcal{L}_a(\alpha=2)$   | $2.5 \cdot \mathcal{L}_u(t=2)$ | rand | 400 | 128 | 0.06 | 128 | 0.7696 | 0.8208 | 0.7669 | 0.8141 |
| —                                   | $2 \cdot \mathcal{L}_a(\alpha=1)$     | $\mathcal{L}_u(t=2)$           | rand | 400 | 128 | 0.06 | 128 | 0.7209 | 0.7839 | 0.7370 | 0.7867 |
| $0.5 \cdot \mathcal{L}_c(\tau=0.1)$ | —                                     | —                              | rand | 400 | 128 | 0.06 | 128 | 0.7062 | 0.7586 | 0.7024 | 0.7575 |
| $\mathcal{L}_c(\tau=10)$            | —                                     | —                              | rand | 400 | 128 | 0.06 | 128 | 0.7860 | 0.8375 | 0.7850 | 0.8335 |
| —                                   | $3.375 \cdot \mathcal{L}_a(\alpha=1)$ | $\mathcal{L}_u(t=2)$           | rand | 400 | 128 | 0.06 | 128 | 0.7236 | 0.7703 | 0.7230 | 0.7728 |
| —                                   | $0.25 \cdot \mathcal{L}_a(\alpha=2)$  | $\mathcal{L}_u(t=2)$           | rand | 400 | 128 | 0.06 | 128 | 0.7596 | 0.8122 | 0.7574 | 0.8107 |
| $\mathcal{L}_c(\tau=0.3)$           | —                                     | —                              | rand | 400 | 128 | 0.06 | 128 | 0.7337 | 0.7653 | 0.7361 | 0.7640 |
| $\mathcal{L}_c(\tau=5)$             | —                                     | —                              | rand | 400 | 128 | 0.06 | 128 | 0.7801 | 0.8278 | 0.7715 | 0.8355 |
| —                                   | $3.25 \cdot \mathcal{L}_a(\alpha=2)$  | $\mathcal{L}_u(t=2)$           | rand | 400 | 128 | 0.06 | 128 | 0.7495 | 0.7903 | 0.7503 | 0.7941 |
| —                                   | $0.5 \cdot \mathcal{L}_a(\alpha=2)$   | $4 \cdot \mathcal{L}_u(t=2)$   | rand | 400 | 128 | 0.06 | 128 | 0.8062 | 0.8597 | 0.8042 | 0.8608 |

**Understanding Contrastive Representation Learning through Alignment and Uniformity on the Hypersphere**

Table 5: Experiment specifications for all 45 IMAGENET-100 ResNet50 encoders trained using methods based on Momentum Contrast (MoCo) (He et al., 2019). We report the encoder representation quality measured by accuracy of a linear classifier on penultimate layer activations, via both a 3-fold cross validation of the training set and the held out validation set. All encoders in this table use standard network initialization (denoted as “rand”). Dimensionality (abbreviated as “Dim.”) shows the ambient dimension of the output features, i.e., they live on the unit hypersphere of one less dimension. For  $\mathcal{L}_{\text{uniform}}$ , the “Intra-batch” column denotes whether  $\mathcal{L}_{\text{uniform}}$  calculation includes pairwise distances within batch in addition to distances w.r.t. to the queue (i.e., Equation (16) vs. Equation (15)).

| Losses                             |                                      |                                  |             | Init. | Epochs | Batch Size | Queue Size | Initial LR | Dim. | Training Set 3-Fold Cross Val. Accuracy $\uparrow$ |               | Validation Set Accuracy $\uparrow$ |               |
|------------------------------------|--------------------------------------|----------------------------------|-------------|-------|--------|------------|------------|------------|------|----------------------------------------------------|---------------|------------------------------------|---------------|
| $\mathcal{L}_{\text{contrastive}}$ | $\mathcal{L}_{\text{align}}$         | $\mathcal{L}_{\text{uniform}}$   |             |       |        |            |            |            |      | top1                                               | top5          | top1                               | top5          |
|                                    |                                      | Form                             | Intra-batch |       |        |            |            |            |      |                                                    |               |                                    |               |
| $\mathcal{L}_c(\tau=0.01)$         | —                                    | —                                | —           | rand  | 240    | 128        | 16384      | 0.03       | 128  | 62.45%                                             | 85.64%        | 64.14%                             | 86.12%        |
| $\mathcal{L}_c(\tau=0.07)$         | —                                    | —                                | —           | rand  | 240    | 128        | 16384      | 0.03       | 128  | 71.68%                                             | 91.00%        | 72.80%                             | 91.64%        |
| $\mathcal{L}_c(\tau=0.5)$          | —                                    | —                                | —           | rand  | 240    | 128        | 16384      | 0.03       | 128  | 68.56%                                             | 91.21%        | 69.98%                             | 91.80%        |
| $\mathcal{L}_c(\tau=1)$            | —                                    | —                                | —           | rand  | 240    | 128        | 16384      | 0.03       | 128  | 62.19%                                             | 87.73%        | 64.06%                             | 88.32%        |
| $\mathcal{L}_c(\tau=2)$            | —                                    | —                                | —           | rand  | 240    | 128        | 16384      | 0.03       | 128  | 53.62%                                             | 83.03%        | 55.46%                             | 84.18%        |
| $\mathcal{L}_c(\tau=5)$            | —                                    | —                                | —           | rand  | 240    | 128        | 16384      | 0.03       | 128  | 37.52%                                             | 68.93%        | 39.00%                             | 70.86%        |
| —                                  | $2 \cdot \mathcal{L}_a(\alpha=2)$    | —                                | —           | rand  | 240    | 128        | 16384      | 0.03       | 128  | 1.03%                                              | 5.12%         | 1.22%                              | 5.42%         |
| —                                  | $\mathcal{L}_a(\alpha=2)$            | $0.125 \cdot \mathcal{L}_u(t=8)$ | ✓           | rand  | 240    | 128        | 16384      | 0.03       | 128  | 65.89%                                             | 88.28%        | 67.42%                             | 88.96%        |
| —                                  | $\mathcal{L}_a(\alpha=2)$            | $0.15 \cdot \mathcal{L}_u(t=7)$  | ✓           | rand  | 240    | 128        | 16384      | 0.03       | 128  | 67.51%                                             | 88.95%        | 68.90%                             | 89.68%        |
| —                                  | $\mathcal{L}_a(\alpha=2)$            | $0.17 \cdot \mathcal{L}_u(t=6)$  | ✓           | rand  | 240    | 128        | 16384      | 0.03       | 128  | 67.90%                                             | 89.83%        | 69.18%                             | 90.76%        |
| —                                  | $\mathcal{L}_a(\alpha=2)$            | $0.2 \cdot \mathcal{L}_u(t=5)$   | ✓           | rand  | 240    | 128        | 16384      | 0.03       | 128  | 69.27%                                             | 90.08%        | 70.46%                             | 90.86%        |
| —                                  | $1.8 \cdot \mathcal{L}_a(\alpha=2)$  | $0.2 \cdot \mathcal{L}_u(t=2)$   | ✓           | rand  | 240    | 128        | 16384      | 0.03       | 128  | 1.00%                                              | 4.94%         | 1.00%                              | 5.00%         |
| —                                  | $\mathcal{L}_a(\alpha=2)$            | $0.25 \cdot \mathcal{L}_u(t=4)$  | ✓           | rand  | 240    | 128        | 16384      | 0.03       | 128  | 69.77%                                             | 90.57%        | 70.70%                             | 91.14%        |
| —                                  | $\mathcal{L}_a(\alpha=2)$            | $0.33 \cdot \mathcal{L}_u(t=3)$  | ✓           | rand  | 240    | 128        | 16384      | 0.03       | 128  | 70.67%                                             | 91.14%        | 71.86%                             | 91.58%        |
| —                                  | $1.6 \cdot \mathcal{L}_a(\alpha=2)$  | $0.4 \cdot \mathcal{L}_u(t=2)$   | ✓           | rand  | 240    | 128        | 16384      | 0.03       | 128  | 67.34%                                             | 90.27%        | 69.16%                             | 91.00%        |
| —                                  | $\mathcal{L}_a(\alpha=2)$            | $0.5 \cdot \mathcal{L}_u(t=2)$   | ✗           | rand  | 240    | 128        | 16384      | 0.03       | 128  | 70.91%                                             | 91.38%        | 72.34%                             | 91.86%        |
| —                                  | $\mathcal{L}_a(\alpha=2)$            | $0.5 \cdot \mathcal{L}_u(t=2)$   | ✓           | rand  | 240    | 128        | 16384      | 0.03       | 128  | 71.03%                                             | 91.61%        | 71.90%                             | 92.06%        |
| —                                  | $1.4 \cdot \mathcal{L}_a(\alpha=2)$  | $0.6 \cdot \mathcal{L}_u(t=2)$   | ✓           | rand  | 240    | 128        | 16384      | 0.03       | 128  | 71.11%                                             | 91.69%        | 72.06%                             | 92.28%        |
| —                                  | $1.2 \cdot \mathcal{L}_a(\alpha=2)$  | $0.8 \cdot \mathcal{L}_u(t=2)$   | ✓           | rand  | 240    | 128        | 16384      | 0.03       | 128  | 71.76%                                             | 91.51%        | 72.78%                             | 91.90%        |
| —                                  | $0.75 \cdot \mathcal{L}_a(\alpha=2)$ | $\mathcal{L}_u(t=2)$             | ✓           | rand  | 240    | 128        | 16384      | 0.03       | 128  | 70.23%                                             | 91.01%        | 71.40%                             | 91.36%        |
| —                                  | $\mathcal{L}_a(\alpha=2)$            | $\mathcal{L}_u(t=1)$             | ✓           | rand  | 240    | 128        | 16384      | 0.03       | 128  | 68.07%                                             | 90.66%        | 69.54%                             | 91.14%        |
| —                                  | $\mathcal{L}_a(\alpha=2)$            | $\mathcal{L}_u(t=2)$             | ✗           | rand  | 240    | 128        | 16384      | 0.03       | 128  | 69.59%                                             | 90.67%        | 70.64%                             | 91.28%        |
| —                                  | $\mathcal{L}_a(\alpha=2)$            | $\mathcal{L}_u(t=2)$             | ✓           | rand  | 240    | 128        | 16384      | 0.03       | 128  | 70.45%                                             | 91.25%        | 71.48%                             | 91.72%        |
| —                                  | $1.5 \cdot \mathcal{L}_a(\alpha=2)$  | $\mathcal{L}_u(t=2)$             | ✓           | rand  | 240    | 128        | 16384      | 0.03       | 128  | 72.39%                                             | 91.71%        | 73.80%                             | 92.22%        |
| —                                  | $2 \cdot \mathcal{L}_a(\alpha=2)$    | $\mathcal{L}_u(t=2)$             | ✗           | rand  | 240    | 128        | 16384      | 0.03       | 128  | 72.19%                                             | <b>92.35%</b> | 73.30%                             | 92.74%        |
| —                                  | $2 \cdot \mathcal{L}_a(\alpha=2)$    | $\mathcal{L}_u(t=2)$             | ✗           | rand  | 240    | 128        | 32768      | 0.03       | 128  | 72.41%                                             | 92.08%        | 73.54%                             | 92.74%        |
| —                                  | $2 \cdot \mathcal{L}_a(\alpha=2)$    | $\mathcal{L}_u(t=2)$             | ✓           | rand  | 240    | 128        | 16384      | 0.03       | 128  | 72.69%                                             | 92.21%        | 73.74%                             | <b>92.80%</b> |
| —                                  | $2 \cdot \mathcal{L}_a(\alpha=2)$    | $\mathcal{L}_u(t=2)$             | ✓           | rand  | 240    | 128        | 32768      | 0.03       | 128  | 72.65%                                             | 92.09%        | 73.68%                             | 92.46%        |
| —                                  | $2.5 \cdot \mathcal{L}_a(\alpha=2)$  | $\mathcal{L}_u(t=2)$             | ✗           | rand  | 240    | 128        | 16384      | 0.03       | 128  | 71.77%                                             | 91.99%        | 73.00%                             | 92.14%        |
| —                                  | $2.5 \cdot \mathcal{L}_a(\alpha=2)$  | $\mathcal{L}_u(t=2)$             | ✓           | rand  | 240    | 128        | 16384      | 0.03       | 128  | 72.31%                                             | 91.99%        | 73.50%                             | 92.38%        |
| —                                  | $3 \cdot \mathcal{L}_a(\alpha=2)$    | $\mathcal{L}_u(t=2)$             | ✓           | rand  | 240    | 128        | 16384      | 0.03       | 128  | 72.03%                                             | 92.09%        | 73.48%                             | 92.56%        |
| —                                  | $3 \cdot \mathcal{L}_a(\alpha=2)$    | $\mathcal{L}_u(t=3)$             | ✓           | rand  | 240    | 128        | 16384      | 0.03       | 128  | <b>73.49%</b>                                      | 92.24%        | <b>74.60%</b>                      | 92.74%        |
| —                                  | $4 \cdot \mathcal{L}_a(\alpha=2)$    | $\mathcal{L}_u(t=4)$             | ✓           | rand  | 240    | 128        | 16384      | 0.03       | 128  | 72.93%                                             | 92.03%        | 74.30%                             | 92.54%        |
| —                                  | $5 \cdot \mathcal{L}_a(\alpha=2)$    | $\mathcal{L}_u(t=5)$             | ✓           | rand  | 240    | 128        | 16384      | 0.03       | 128  | 71.96%                                             | 91.67%        | 73.04%                             | 92.28%        |
| —                                  | $6 \cdot \mathcal{L}_a(\alpha=2)$    | $\mathcal{L}_u(t=6)$             | ✓           | rand  | 240    | 128        | 16384      | 0.03       | 128  | 70.49%                                             | 90.63%        | 72.02%                             | 91.24%        |
| —                                  | $7 \cdot \mathcal{L}_a(\alpha=2)$    | $\mathcal{L}_u(t=7)$             | ✓           | rand  | 240    | 128        | 16384      | 0.03       | 128  | 70.66%                                             | 90.83%        | 72.32%                             | 91.86%        |
| —                                  | $8 \cdot \mathcal{L}_a(\alpha=2)$    | $\mathcal{L}_u(t=8)$             | ✓           | rand  | 240    | 128        | 16384      | 0.03       | 128  | 69.47%                                             | 90.33%        | 70.86%                             | 91.26%        |
| —                                  | $0.8 \cdot \mathcal{L}_a(\alpha=2)$  | $1.2 \cdot \mathcal{L}_u(t=2)$   | ✓           | rand  | 240    | 128        | 16384      | 0.03       | 128  | 70.45%                                             | 90.72%        | 71.22%                             | 91.06%        |
| —                                  | $0.6 \cdot \mathcal{L}_a(\alpha=2)$  | $1.4 \cdot \mathcal{L}_u(t=2)$   | ✓           | rand  | 240    | 128        | 16384      | 0.03       | 128  | 69.03%                                             | 90.53%        | 70.44%                             | 90.92%        |
| —                                  | $0.4 \cdot \mathcal{L}_a(\alpha=2)$  | $1.6 \cdot \mathcal{L}_u(t=2)$   | ✓           | rand  | 240    | 128        | 16384      | 0.03       | 128  | 67.04%                                             | 89.24%        | 68.32%                             | 89.76%        |
| —                                  | $0.2 \cdot \mathcal{L}_a(\alpha=2)$  | $1.8 \cdot \mathcal{L}_u(t=2)$   | ✓           | rand  | 240    | 128        | 16384      | 0.03       | 128  | 66.71%                                             | 88.93%        | 68.10%                             | 89.48%        |
| —                                  | —                                    | $2 \cdot \mathcal{L}_u(t=2)$     | ✓           | rand  | 240    | 128        | 16384      | 0.03       | 128  | 2.43%                                              | 9.97%         | 2.92%                              | 10.56%        |
| —                                  | $\mathcal{L}_a(\alpha=2)$            | $\mathcal{L}_u(t=2)$             | ✓           | rand  | 240    | 128        | 16384      | 0.03       | 128  | 58.43%                                             | 84.67%        | 60.36%                             | 85.02%        |
| —                                  | $2 \cdot \mathcal{L}_a(\alpha=2)$    | $\mathcal{L}_u(t=2)$             | ✗           | rand  | 240    | 128        | 32768      | 0.03       | 128  | 69.68%                                             | 91.13%        | 70.80%                             | 91.80%        |
| —                                  | $2 \cdot \mathcal{L}_a(\alpha=2)$    | $\mathcal{L}_u(t=2)$             | ✓           | rand  | 240    | 128        | 16384      | 0.03       | 128  | 69.62%                                             | 90.77%        | 70.92%                             | 91.42%        |

Table 6: Experiment specifications for all 108 BOOKCORPUS recurrent encoders trained using methods based on Quick-Thought Vectors (Logeswaran & Lee, 2018). We report the encoder representation quality measured by accuracy of logistic classifiers on encoder outputs for the Movie Review Sentence Polarity (MR) and Customer Product Sentiment (CR) binary classification tasks, via both a 5-fold cross validation of the training set (of the downstream task) and the held out validation set (of the downstream task).

All encoders in this table use standard network initialization (denoted as “rand”). Dimensionality (abbreviated as “Dim.”) shows the ambient dimension of the output features, i.e., features from  $l_2$ -normalized encoders live on the unit hypersphere of one less dimension. Regardless of whether the encoder is  $l_2$ -normalized (indicated in “Normalization” column), the features are always normalized before being used for downstream tasks, following Logeswaran & Lee (2018).

The only unnormalized encoder is obtained using the unmodified Quick-Thought Vectors algorithm. 6 configurations that suffer from training instability (i.e., NaN occurring) are also reported.

| Losses                             |                                        |                                   | Normalization | Init. | Epochs | Batch Size | Initial LR | Dim. | Training Set 5-Fold Cross Val. Accuracy $\uparrow$ |               | Validation Set Accuracy $\uparrow$ |               |
|------------------------------------|----------------------------------------|-----------------------------------|---------------|-------|--------|------------|------------|------|----------------------------------------------------|---------------|------------------------------------|---------------|
| $\mathcal{L}_{\text{contrastive}}$ | $\mathcal{L}_{\text{align}}$           | $\mathcal{L}_{\text{uniform}}$    |               |       |        |            |            |      | MR                                                 | CR            | MR                                 | CR            |
| $\mathcal{L}_c(\tau=1)$            | —                                      | —                                 | $\times$      | rand  | 1      | 400        | 0.0005     | 1200 | 76.33%                                             | 81.90%        | 77.23%                             | 83.07%        |
| $\mathcal{L}_c(\tau=0.005)$        | —                                      | —                                 | $\checkmark$  | rand  | 1      | 400        | 0.0005     | 1200 | 74.97%                                             | 82.94%        | 76.85%                             | 82.54%        |
| $\mathcal{L}_c(\tau=0.01)$         | —                                      | —                                 | $\checkmark$  | rand  | 1      | 400        | 0.0005     | 1200 | 75.02%                                             | 82.20%        | 75.54%                             | 82.28%        |
| $\mathcal{L}_c(\tau=0.05)$         | —                                      | —                                 | $\checkmark$  | rand  | 1      | 400        | 0.0005     | 1200 | 75.48%                                             | <b>83.64%</b> | <b>77.69%</b>                      | 83.86%        |
| $\mathcal{L}_c(\tau=0.075)$        | —                                      | —                                 | $\checkmark$  | rand  | 1      | 400        | 0.0005     | 1200 | <b>76.37%</b>                                      | 83.32%        | 77.51%                             | 82.28%        |
| $\mathcal{L}_c(\tau=0.1)$          | —                                      | —                                 | $\checkmark$  | rand  | 1      | 400        | 0.0005     | 1200 | 75.82%                                             | 81.90%        | 74.79%                             | 83.86%        |
| $\mathcal{L}_c(\tau=0.2)$          | —                                      | —                                 | $\checkmark$  | rand  | 1      | 400        | 0.0005     | 1200 | 74.33%                                             | 81.08%        | 75.63%                             | 80.16%        |
| $\mathcal{L}_c(\tau=0.25)$         | —                                      | —                                 | $\checkmark$  | rand  | 1      | 400        | 0.0005     | 1200 | 72.33%                                             | 79.49%        | 71.51%                             | 78.84%        |
| $\mathcal{L}_c(\tau=0.3)$          | —                                      | —                                 | $\checkmark$  | rand  | 1      | 400        | 0.0005     | 1200 | 72.85%                                             | 78.54%        | 73.57%                             | 79.10%        |
| $\mathcal{L}_c(\tau=0.4)$          | —                                      | —                                 | $\checkmark$  | rand  | 1      | 400        | 0.0005     | 1200 | 69.72%                                             | 77.28%        | 67.85%                             | 77.51%        |
| $\mathcal{L}_c(\tau=0.5)$          | —                                      | —                                 | $\checkmark$  | rand  | 1      | 400        | 0.0005     | 1200 | 68.97%                                             | 76.27%        | 68.98%                             | 74.07%        |
| $\mathcal{L}_c(\tau=0.6)$          | —                                      | —                                 | $\checkmark$  | rand  | 1      | 400        | 0.0005     | 1200 | 68.61%                                             | 75.48%        | 68.88%                             | 73.81%        |
| $\mathcal{L}_c(\tau=0.7)$          | —                                      | —                                 | $\checkmark$  | rand  | 1      | 400        | 0.0005     | 1200 | 67.89%                                             | 74.01%        | 67.76%                             | 76.46%        |
| $\mathcal{L}_c(\tau=0.8)$          | —                                      | —                                 | $\checkmark$  | rand  | 1      | 400        | 0.0005     | 1200 | 67.02%                                             | 74.77%        | 66.07%                             | 74.34%        |
| $\mathcal{L}_c(\tau=0.9)$          | —                                      | —                                 | $\checkmark$  | rand  | 1      | 400        | 0.0005     | 1200 | 66.78%                                             | 74.01%        | 65.32%                             | 72.75%        |
| $\mathcal{L}_c(\tau=1)$            | —                                      | —                                 | $\checkmark$  | rand  | 1      | 400        | 0.0005     | 1200 | 66.67%                                             | 74.12%        | 65.79%                             | 74.34%        |
| $\mathcal{L}_c(\tau=1.5)$          | —                                      | —                                 | $\checkmark$  | rand  | 1      | 400        | 0.0005     | 1200 | 63.92%                                             | 70.47%        | 65.42%                             | 75.93%        |
| $\mathcal{L}_c(\tau=2)$            | —                                      | —                                 | $\checkmark$  | rand  | 1      | 400        | 0.0005     | 1200 | 63.97%                                             | 72.06%        | 62.79%                             | 71.69%        |
| $\mathcal{L}_c(\tau=5)$            | —                                      | —                                 | $\checkmark$  | rand  | 1      | 400        | 0.0005     | 1200 | 62.21%                                             | 69.50%        | 62.98%                             | 73.54%        |
| $\mathcal{L}_c(\tau=0.075)$        | $\mathcal{L}_a(\alpha=2)$              | —                                 | $\checkmark$  | rand  | 1      | 400        | 0.0005     | 1200 | 69.16%                                             | 73.39%        | 68.13%                             | 72.75%        |
| $\mathcal{L}_c(\tau=1)$            | $\mathcal{L}_a(\alpha=2)$              | —                                 | $\checkmark$  | rand  | 1      | 400        | 0.0005     | 1200 | 49.68%                                             | 63.81%        | 49.77%                             | 63.49%        |
| $\mathcal{L}_c(\tau=0.075)$        | $0.9 \cdot \mathcal{L}_a(\alpha=2)$    | $0.1 \cdot \mathcal{L}_u(t=2)$    | $\checkmark$  | rand  | 1      | 400        | 0.0005     | 1200 | 71.26%                                             | 77.90%        | 71.42%                             | 76.72%        |
| $\mathcal{L}_c(\tau=1)$            | $0.9 \cdot \mathcal{L}_a(\alpha=2)$    | $0.1 \cdot \mathcal{L}_u(t=2)$    | $\checkmark$  | rand  | 1      | 400        | 0.0005     | 1200 | 51.26%                                             | 63.78%        | 52.01%                             | 63.49%        |
| $\mathcal{L}_c(\tau=0.075)$        | $0.8 \cdot \mathcal{L}_a(\alpha=2)$    | $0.2 \cdot \mathcal{L}_u(t=2)$    | $\checkmark$  | rand  | 1      | 400        | 0.0005     | 1200 | 76.25%                                             | 83.05%        | 76.48%                             | 83.33%        |
| $\mathcal{L}_c(\tau=1)$            | $0.8 \cdot \mathcal{L}_a(\alpha=2)$    | $0.2 \cdot \mathcal{L}_u(t=2)$    | $\checkmark$  | rand  | 1      | 400        | 0.0005     | 1200 | 71.33%                                             | 79.31%        | 70.48%                             | 78.31%        |
| $\mathcal{L}_c(\tau=0.075)$        | $0.7 \cdot \mathcal{L}_a(\alpha=2)$    | $0.3 \cdot \mathcal{L}_u(t=2)$    | $\checkmark$  | rand  | 1      | 400        | 0.0005     | 1200 | 75.67%                                             | 81.20%        | 74.60%                             | 81.48%        |
| $\mathcal{L}_c(\tau=1)$            | $0.7 \cdot \mathcal{L}_a(\alpha=2)$    | $0.3 \cdot \mathcal{L}_u(t=2)$    | $\checkmark$  | rand  | 1      | 400        | 0.0005     | 1200 | 71.59%                                             | 78.72%        | 73.66%                             | 78.84%        |
| $\mathcal{L}_c(\tau=0.075)$        | $0.6 \cdot \mathcal{L}_a(\alpha=2)$    | $0.4 \cdot \mathcal{L}_u(t=2)$    | $\checkmark$  | rand  | 1      | 400        | 0.0005     | 1200 | 75.06%                                             | 82.23%        | 74.41%                             | 81.48%        |
| $\mathcal{L}_c(\tau=1)$            | $0.6 \cdot \mathcal{L}_a(\alpha=2)$    | $0.4 \cdot \mathcal{L}_u(t=2)$    | $\checkmark$  | rand  | 1      | 400        | 0.0005     | 1200 | 70.53%                                             | 78.43%        | 68.88%                             | 75.93%        |
| $\mathcal{L}_c(\tau=0.075)$        | $0.5 \cdot \mathcal{L}_a(\alpha=2)$    | $0.5 \cdot \mathcal{L}_u(t=2)$    | $\checkmark$  | rand  | 1      | 400        | 0.0005     | 1200 | 74.45%                                             | 81.61%        | 74.51%                             | <b>84.66%</b> |
| $\mathcal{L}_c(\tau=1)$            | $0.5 \cdot \mathcal{L}_a(\alpha=2)$    | $0.5 \cdot \mathcal{L}_u(t=2)$    | $\checkmark$  | rand  | 1      | 400        | 0.0005     | 1200 | 66.06%                                             | 72.97%        | 63.64%                             | 73.02%        |
| $\mathcal{L}_c(\tau=0.075)$        | $0.4 \cdot \mathcal{L}_a(\alpha=2)$    | $0.6 \cdot \mathcal{L}_u(t=2)$    | $\checkmark$  | rand  | 1      | 400        | 0.0005     | 1200 | 73.23%                                             | 80.61%        | 74.32%                             | 82.54%        |
| $\mathcal{L}_c(\tau=1)$            | $0.4 \cdot \mathcal{L}_a(\alpha=2)$    | $0.6 \cdot \mathcal{L}_u(t=2)$    | $\checkmark$  | rand  | 1      | 400        | 0.0005     | 1200 | 57.75%                                             | 67.55%        | 57.92%                             | 69.84%        |
| $\mathcal{L}_c(\tau=0.075)$        | $0.3 \cdot \mathcal{L}_a(\alpha=2)$    | $0.7 \cdot \mathcal{L}_u(t=2)$    | $\checkmark$  | rand  | 1      | 400        | 0.0005     | 1200 | 72.99%                                             | 79.46%        | 74.88%                             | 77.25%        |
| $\mathcal{L}_c(\tau=1)$            | $0.3 \cdot \mathcal{L}_a(\alpha=2)$    | $0.7 \cdot \mathcal{L}_u(t=2)$    | $\checkmark$  | rand  | 1      | 400        | 0.0005     | 1200 | 56.96%                                             | 64.31%        | 55.30%                             | 65.34%        |
| $\mathcal{L}_c(\tau=0.075)$        | $0.2 \cdot \mathcal{L}_a(\alpha=2)$    | $0.8 \cdot \mathcal{L}_u(t=2)$    | $\checkmark$  | rand  | 1      | 400        | 0.0005     | 1200 | 71.94%                                             | 79.43%        | 70.95%                             | 78.04%        |
| $\mathcal{L}_c(\tau=1)$            | $0.2 \cdot \mathcal{L}_a(\alpha=2)$    | $0.8 \cdot \mathcal{L}_u(t=2)$    | $\checkmark$  | rand  | 1      | 400        | 0.0005     | 1200 | 54.90%                                             | 64.22%        | 55.11%                             | 63.76%        |
| $\mathcal{L}_c(\tau=0.075)$        | $0.1 \cdot \mathcal{L}_a(\alpha=2)$    | $0.9 \cdot \mathcal{L}_u(t=2)$    | $\checkmark$  | rand  | 1      | 400        | 0.0005     | 1200 | 70.53%                                             | 78.25%        | 69.82%                             | 78.57%        |
| $\mathcal{L}_c(\tau=1)$            | $0.1 \cdot \mathcal{L}_a(\alpha=2)$    | $0.9 \cdot \mathcal{L}_u(t=2)$    | $\checkmark$  | rand  | 1      | 400        | 0.0005     | 1200 | 55.56%                                             | 64.90%        | 53.98%                             | 65.08%        |
| $\mathcal{L}_c(\tau=0.075)$        | —                                      | $\mathcal{L}_u(t=2)$              | $\checkmark$  | rand  | 1      | 400        | 0.0005     | 1200 | 70.13%                                             | 77.66%        | 70.67%                             | 77.25%        |
| $\mathcal{L}_c(\tau=1)$            | —                                      | $\mathcal{L}_u(t=2)$              | $\checkmark$  | rand  | 1      | 400        | 0.0005     | 1200 | 54.76%                                             | 63.45%        | 53.98%                             | 64.81%        |
| —                                  | $\mathcal{L}_a(\alpha=2)$              | —                                 | $\checkmark$  | rand  | 1      | 400        | 0.0005     | 1200 | 49.85%                                             | 63.81%        | 50.05%                             | 63.49%        |
| —                                  | $\mathcal{L}_a(\alpha=2)$              | —                                 | $\checkmark$  | rand  | 1      | 400        | 0.0005     | 1200 | 50.02%                                             | 63.81%        | 49.30%                             | 63.49%        |
| —                                  | $\mathcal{L}_a(\alpha=2)$              | —                                 | $\checkmark$  | rand  | 1      | 400        | 0.0005     | 1200 | 50.04%                                             | 63.81%        | 49.95%                             | 63.49%        |
| —                                  | $0.9091 \cdot \mathcal{L}_a(\alpha=2)$ | $0.0909 \cdot \mathcal{L}_u(t=2)$ | $\checkmark$  | rand  | 1      | 400        | 0.0005     | 1200 | 49.67%                                             | 63.81%        | 49.86%                             | 63.49%        |
| —                                  | $0.9 \cdot \mathcal{L}_a(\alpha=2)$    | $0.1 \cdot \mathcal{L}_u(t=2)$    | $\checkmark$  | rand  | 1      | 400        | 0.0005     | 1200 | 49.71%                                             | 63.81%        | 49.77%                             | 63.49%        |
| —                                  | $0.9 \cdot \mathcal{L}_a(\alpha=2)$    | $0.1 \cdot \mathcal{L}_u(t=5)$    | $\checkmark$  | rand  | 1      | 400        | 0.0005     | 1200 | 73.42%                                             | 81.23%        | 73.76%                             | 80.95%        |





## Understanding Contrastive Representation Learning through Alignment and Uniformity on the Hypersphere

---

|   |                                        |                                   |   |      |   |     |        |      |              |
|---|----------------------------------------|-----------------------------------|---|------|---|-----|--------|------|--------------|
| — | $0.8889 \cdot \mathcal{L}_a(\alpha=1)$ | $0.1111 \cdot \mathcal{L}_u(t=2)$ | ✓ | rand | 1 | 400 | 0.0005 | 1200 | NaN occurred |
| — | $0.875 \cdot \mathcal{L}_a(\alpha=1)$  | $0.125 \cdot \mathcal{L}_u(t=2)$  | ✓ | rand | 1 | 400 | 0.0005 | 1200 | NaN occurred |
| — | $0.8571 \cdot \mathcal{L}_a(\alpha=1)$ | $0.1429 \cdot \mathcal{L}_u(t=2)$ | ✓ | rand | 1 | 400 | 0.0005 | 1200 | NaN occurred |

## References

- Bachman, P., Hjelm, R. D., and Buchwalter, W. Learning representations by maximizing mutual information across views. In *Advances in Neural Information Processing Systems*, pp. 15509–15519, 2019.
- Bochner, S. Monotone funktionen, stieltjessche integrale und harmonische analyse. *Collected Papers of Salomon Bochner*, 2:87, 1992.
- Borodachov, S. V., Hardin, D. P., and Saff, E. B. *Discrete energy on rectifiable sets*. Springer, 2019.
- Cho, K., van Merriënboer, B., Gulcehre, C., Bahdanau, D., Bougares, F., Schwenk, H., and Bengio, Y. Learning phrase representations using RNN encoder–decoder for statistical machine translation. In *Proceedings of the 2014 Conference on Empirical Methods in Natural Language Processing (EMNLP)*, pp. 1724–1734, Doha, Qatar, October 2014. Association for Computational Linguistics. doi: 10.3115/v1/D14-1179.
- Goyal, P., Dollár, P., Girshick, R., Noordhuis, P., Wesolowski, L., Kyrola, A., Tulloch, A., Jia, Y., and He, K. Accurate, large minibatch sgd: Training imagenet in 1 hour. *arXiv preprint arXiv:1706.02677*, 2017.
- He, K., Zhang, X., Ren, S., and Sun, J. Deep residual learning for image recognition. In *Proceedings of the IEEE conference on computer vision and pattern recognition*, pp. 770–778, 2016.
- He, K., Fan, H., Wu, Y., Xie, S., and Girshick, R. Momentum contrast for unsupervised visual representation learning. *arXiv preprint arXiv:1911.05722*, 2019.
- Hénaff, O. J., Razavi, A., Doersch, C., Eslami, S., and Oord, A. v. d. Data-efficient image recognition with contrastive predictive coding. *arXiv preprint arXiv:1905.09272*, 2019.
- Hjelm, R. D., Fedorov, A., Lavoie-Marchildon, S., Grewal, K., Bachman, P., Trischler, A., and Bengio, Y. Learning deep representations by mutual information estimation and maximization. *arXiv preprint arXiv:1808.06670*, 2018.
- Ioffe, S. and Szegedy, C. Batch normalization: Accelerating deep network training by reducing internal covariate shift. In *International Conference on Machine Learning*, pp. 448–456, 2015.
- Kingma, D. P. and Ba, J. Adam: A method for stochastic optimization. *arXiv preprint arXiv:1412.6980*, 2014.
- Kiros, R., Zhu, Y., Salakhutdinov, R., Zemel, R. S., Torralba, A., Urtasun, R., and Fidler, S. Skip-thought vectors. *arXiv preprint arXiv:1506.06726*, 2015.
- Kobayashi, S. Homemade bookcorpus. GitHub repository <https://github.com/soskek/bookcorpus/tree/5fe0cec8d7fd83940e48c799739496dc68ab2798>, 2019.
- Logeswaran, L. and Lee, H. An efficient framework for learning sentence representations. In *International Conference on Learning Representations*, 2018.
- Nathan Silberman, Derek Hoiem, P. K. and Fergus, R. Indoor segmentation and support inference from rgb-d images. In *ECCV*, 2012.
- Oord, A. v. d., Li, Y., and Vinyals, O. Representation learning with contrastive predictive coding. *arXiv preprint arXiv:1807.03748*, 2018.
- Serfozo, R. Convergence of lebesgue integrals with varying measures. *Sankhyā: The Indian Journal of Statistics, Series A*, pp. 380–402, 1982.
- Stewart, J. Positive definite functions and generalizations, an historical survey. *The Rocky Mountain Journal of Mathematics*, 6(3): 409–434, 1976.
- Tian, Y. Contrastive multiview coding. GitHub repository <https://github.com/HobbitLong/CMC/tree/58d06e9a82f7fea2e4af0a251726e9c6bf67c7c9>, 2019.
- Tian, Y., Krishnan, D., and Isola, P. Contrastive multiview coding. *arXiv preprint arXiv:1906.05849*, 2019.
- Wu, Z., Xiong, Y., Yu, S. X., and Lin, D. Unsupervised feature learning via non-parametric instance discrimination. In *Proceedings of the IEEE Conference on Computer Vision and Pattern Recognition*, pp. 3733–3742, 2018.
- Zhu, Y., Kiros, R., Zemel, R., Salakhutdinov, R., Urtasun, R., Torralba, A., and Fidler, S. Aligning books and movies: Towards story-like visual explanations by watching movies and reading books. In *arXiv preprint arXiv:1506.06724*, 2015.
